# Supplementary material
Source: PubMed Central journal article supplement (PMC5737177)
Supplement: ba000760-suppl1.pdf [file ba000760-suppl1.pdf]

Supplemental Table S1A. 8 YHJ]g'cZUa d`]Wtbg'i gYX]b': `i ]X][ a `5 WVVgg'5 ffUm

| Chr   | start     | end       | Gene   | Amplicon ID   | average read depth |
|-------|-----------|-----------|--------|---------------|--------------------|
| chr20 | 31022180  | 31022428  | ASXL1  | ASXL1_13_1    | 1505               |
| chr20 | 31023509  | 31023755  | ASXL1  | ASXL1_13_10   | 1826               |
| chr20 | 31023671  | 31023920  | ASXL1  | ASXL1_13_11   | 1833               |
| chr20 | 31023829  | 31024078  | ASXL1  | ASXL1_13_12   | 1782               |
| chr20 | 31023981  | 31024218  | ASXL1  | ASXL1_13_13   | 1191               |
| chr20 | 31024123  | 31024371  | ASXL1  | ASXL1_13_14   | 2066               |
| chr20 | 31024278  | 31024518  | ASXL1  | ASXL1_13_15   | 1482               |
| chr20 | 31024421  | 31024652  | ASXL1  | ASXL1_13_16   | 1880               |
| chr20 | 31024557  | 31024806  | ASXL1  | ASXL1_13_17   | 1466               |
| chr20 | 31024724  | 31024969  | ASXL1  | ASXL1_13_18   | 1370               |
| chr20 | 31022350  | 31022586  | ASXL1  | ASXL1_13_2    | 1869               |
| chr20 | 31022504  | 31022740  | ASXL1  | ASXL1_13_3    | 2497               |
| chr20 | 31022651  | 31022894  | ASXL1  | ASXL1_13_4    | 2068               |
| chr20 | 31022810  | 31023027  | ASXL1  | ASXL1_13_5    | 1958               |
| chr20 | 31022949  | 31023198  | ASXL1  | ASXL1_13_6    | 1517               |
| chr20 | 31023122  | 31023363  | ASXL1  | ASXL1_13_7    | 1463               |
| chr20 | 31023306  | 31023533  | ASXL1  | ASXL1_13_8    | 1735               |
| chr20 | 31023375  | 31023618  | ASXL1  | ASXL1_13_9    | 2860               |
| chrX  | 39914487  | 39914706  | BCOR   | BCOR_11_1     | 2750               |
| chrX  | 39914597  | 39914812  | BCOR   | BCOR_11_2     | 1932               |
| chrX  | 39911465  | 39911709  | BCOR   | BCOR_14_1     | 1870               |
| chrX  | 39933465  | 39933692  | BCOR   | BCOR_4a_1     | 1405               |
| chrX  | 39932442  | 39932678  | BCOR   | BCOR_4b_1     | 1561               |
| chrX  | 39932121  | 39932326  | BCOR   | BCOR_4c_1     | 2059               |
| chrX  | 39922952  | 39923198  | BCOR   | BCOR_8_1      | 978                |
| chr11 | 119155583 | 119155811 | CBL    | CBL_10_1      | 1287               |
| chr11 | 119158381 | 119158620 | CBL    | CBL_12_2      | 1625               |
| chr11 | 119158505 | 119158734 | CBL    | CBL_12_3      | 1007               |
| chr11 | 119158610 | 119158859 | CBL    | CBL_12_5      | 736                |
| chr11 | 119145434 | 119145649 | CBL    | CBL_5_1       | 1147               |
| chr11 | 119145545 | 119145774 | CBL    | CBL_5_2       | 2148               |
| chr11 | 119148351 | 119148598 | CBL    | CBL_8_1       | 1242               |
| chr11 | 119148547 | 119148768 | CBL    | CBL_8_2       | 832                |
| chr11 | 119148694 | 119148925 | CBL    | CBL_8_4       | 663                |
| chr11 | 119148883 | 119149098 | CBL    | CBL_8_5       | 1429               |
| chr11 | 119149095 | 119149343 | CBL    | CBL_9_1       | 837                |
| chr11 | 119149237 | 119149461 | CBL    | CBL_9_2       | 1816               |
| chr9  | 21974474  | 21974716  | CDKN2A | CDKN2A_1_1    | 1084               |
| chr9  | 21974588  | 21974803  | CDKN2A | CDKN2A_1_2    | 1825               |
| chr9  | 21970857  | 21971087  | CDKN2A | CDKN2A_2_1    | 1593               |
| chr9  | 21970995  | 21971236  | CDKN2A | CDKN2A_2_2    | 2752               |
| chr5  | 149441227 | 149441443 | CSF1R  | CSF1R_12_1    | 3087               |
| chr5  | 149436727 | 149436974 | CSF1R  | CSF1R_17_1    | 930                |
| chr5  | 149433804 | 149434052 | CSF1R  | CSF1R_21_1    | 1322               |
| chr5  | 149433545 | 149433794 | CSF1R  | CSF1R_22_1    | 1418               |
| chr5  | 149433611 | 149433828 | CSF1R  | CSF1R_22_2    | 2101               |
| chr5  | 149459745 | 149459988 | CSF1R  | CSF1R_4_1     | 1533               |
| chr5  | 149452803 | 149453037 | CSF1R  | CSF1R_7_1     | 2006               |
| chr5  | 149452857 | 149453105 | CSF1R  | CSF1R_7_2     | 1803               |
| chr5  | 149449646 | 149449894 | CSF1R  | CSF1R_9_1     | 1730               |
| chr7  | 101877263 | 101877503 | CUX1   | CUX1_22_1     | 1937               |
| chr7  | 101877337 | 101877579 | CUX1   | CUX1_22_2     | 1344               |
| chr7  | 101747543 | 101747783 | CUX1   | CUX1_5_1      | 1426               |
| chr5  | 149826388 | 149826610 | del5q  | del5q_SNP_1_1 | 1291               |

|       |           |           |        |                |      |
|-------|-----------|-----------|--------|----------------|------|
| chr5  | 151169807 | 151170039 | del5q  | del5q_SNP_10_1 | 814  |
| chr5  | 149460403 | 149460632 | del5q  | del5q_SNP_3_1  | 1595 |
| chr5  | 149776061 | 149776288 | del5q  | del5q_SNP_4_1  | 1605 |
| chr5  | 150489262 | 150489493 | del5q  | del5q_SNP_5_1  | 1899 |
| chr5  | 150518846 | 150519090 | del5q  | del5q_SNP_6_1  | 1545 |
| chr5  | 150639317 | 150639565 | del5q  | del5q_SNP_7_1  | 2357 |
| chr5  | 150639317 | 150639565 | del5q  | del5q_SNP_8_1  | 2357 |
| chr5  | 151043635 | 151043850 | del5q  | del5q_SNP_9_1  | 1439 |
| chr2  | 25464383  | 25464623  | DNMT3a | DNMT3a_17_1    | 1949 |
| chr2  | 25463424  | 25463664  | DNMT3a | DNMT3a_18_1    | 1978 |
| chr2  | 25463106  | 25463352  | DNMT3a | DNMT3a_19_1    | 1823 |
| chr2  | 25461870  | 25462113  | DNMT3A | DNMT3a_20_1    | 899  |
| chr2  | 25459675  | 25459922  | DNMT3a | DNMT3a_21_1    | 1682 |
| chr2  | 25458516  | 25458751  | DNMT3a | DNMT3a_22_1    | 719  |
| chr2  | 25456997  | 25457198  | DNMT3a | DNMT3a_23_1    | 2832 |
| chr2  | 25457112  | 25457316  | DNMT3a | DNMT3a_23_2    | 2003 |
| chr2  | 25457153  | 25457372  | DNMT3A | DNMT3a_23_3    | 2546 |
| chr2  | 25470820  | 25471059  | DNMT3a | DNMT3a_7_1     | 2667 |
| chr2  | 25470931  | 25471160  | DNMT3a | DNMT3a_7_2     | 1684 |
| chr2  | 25470436  | 25470654  | DNMT3a | DNMT3a_8_1     | 1515 |
| chr2  | 25469856  | 25470097  | DNMT3a | DNMT3a_9_1     | 2494 |
| chr12 | 11992053  | 11992283  | ETV6   | ETV6_3_1       | 2090 |
| chr12 | 12022589  | 12022825  | ETV6   | ETV6_5_1       | 1225 |
| chr12 | 12022687  | 12022910  | ETV6   | ETV6_5_2       | 2041 |
| chr12 | 12037320  | 12037562  | ETV6   | ETV6_6_1       | 1250 |
| chr12 | 12038752  | 12038998  | ETV6   | ETV6_7_1       | 998  |
| chr7  | 148508620 | 148508866 | EZH2   | EZH2_16_1      | 1582 |
| chr13 | 28609548  | 28609764  | FLT3   | FLT3_ex12_1    | 2487 |
| chr13 | 28609656  | 28609886  | FLT3   | FLT3_ex12_2    | 2276 |
| chr13 | 28608365  | 28608586  | FLT3   | FLT3_ex13_1    | 1998 |
| chr13 | 28608147  | 28608396  | FLT3   | FLT3_ex14_1    | 1356 |
| chr13 | 28607941  | 28608157  | FLT3   | FLT3_ex15_1    | 2043 |
| chr13 | 28602257  | 28602472  | FLT3   | FLT3_ex16_1    | 1792 |
| chr13 | 28592520  | 28592767  | FLT3   | FLT3_ex20_1    | 1489 |
| chr13 | 28635978  | 28636209  | FLT3   | FLT3_ex3_1     | 1750 |
| chr13 | 28631412  | 28631660  | FLT3   | FLT3_ex4_1     | 610  |
| chr13 | 28626652  | 28626877  | FLT3   | FLT3_ex5_1     | 867  |
| chr13 | 28624182  | 28624429  | FLT3   | FLT3_ex6_1     | 526  |
| chr13 | 28623460  | 28623681  | FLT3   | FLT3_ex8_1     | 2358 |
| chr13 | 28623545  | 28623785  | FLT3   | FLT3_ex8_2     | 1310 |
| chrX  | 48649448  | 48649664  | GATA1  | GATA1_2_1      | 1355 |
| chrX  | 48649584  | 48649824  | GATA1  | GATA1_2_2      | 1054 |
| chrX  | 48650115  | 48650359  | GATA1  | GATA1_3_1      | 1433 |
| chrX  | 48650265  | 48650511  | GATA1  | GATA1_3_2      | 3308 |
| chr2  | 209112978 | 209113226 | IDH1   | IDH1_ex4a_1    | 373  |
| chr2  | 209112978 | 209113191 | IDH1   | IDH1_ex4a_2    | 1088 |
| chr2  | 209113128 | 209113351 | IDH1   | IDH1_ex4a_3    | 1137 |
| chr2  | 209113129 | 209113337 | IDH1   | IDH1_ex4a_4    | 1357 |
| chr2  | 209113207 | 209113428 | IDH1   | IDH1_ex4a_5    | 2138 |
| chr2  | 209113251 | 209113468 | IDH1   | IDH1_ex4a_6    | 2592 |
| chr2  | 209109916 | 209110160 | IDH1   | IDH1_ex5_1     | 413  |
| chr2  | 209110062 | 209110311 | IDH1   | IDH1_ex5_2     | 29   |
| chr2  | 209104528 | 209104774 | IDH1   | IDH1_ex8_1     | 2189 |
| chr2  | 209103763 | 209103997 | IDH1   | IDH1_ex9_1     | 1333 |
| chr15 | 90631779  | 90631987  | IDH2   | IDH2_ex4_2     | 2007 |
| chr15 | 90631793  | 90632008  | IDH2   | IDH2_ex4_3     | 1859 |
| chr15 | 90631883  | 90632110  | IDH2   | IDH2_ex4_4     | 904  |
| chr15 | 90628455  | 90628704  | IDH2   | IDH2_ex8_1     | 531  |

|       |           |           |        |             |      |
|-------|-----------|-----------|--------|-------------|------|
| chr9  | 5069854   | 5070092   | JAK2   | JAK2_12_1   | 272  |
| chr9  | 5072434   | 5072683   | JAK2   | JAK2_13_1   | 655  |
| chr9  | 5073591   | 5073834   | JAK2   | JAK2_14_1   | 566  |
| chr4  | 55593304  | 55593524  | KIT    | KIT_10_1    | 1881 |
| chr4  | 55593504  | 55593748  | KIT    | KIT_11_1    | 904  |
| chr4  | 55593920  | 55594154  | KIT    | KIT_12_1    | 1116 |
| chr4  | 55594069  | 55594317  | KIT    | KIT_13_1    | 2207 |
| chr4  | 55595383  | 55595606  | KIT    | KIT_14_1    | 964  |
| chr4  | 55595485  | 55595718  | KIT    | KIT_14_2    | 1384 |
| chr4  | 55597398  | 55597614  | KIT    | KIT_15_1    | 1100 |
| chr4  | 55597967  | 55598196  | KIT    | KIT_16_1    | 1782 |
| chr4  | 55599207  | 55599433  | KIT    | KIT_17_1    | 899  |
| chr4  | 55602571  | 55602819  | KIT    | KIT_18_1    | 1484 |
| chr4  | 55602826  | 55603070  | KIT    | KIT_19_1    | 1354 |
| chr4  | 55561618  | 55561833  | KIT    | KIT_2_1     | 1790 |
| chr4  | 55561741  | 55561967  | KIT    | KIT_2_2     | 2773 |
| chr4  | 55603266  | 55603499  | KIT    | KIT_20_1    | 2039 |
| chr4  | 55604524  | 55604773  | KIT    | KIT_21_1    | 1106 |
| chr4  | 55564409  | 55564648  | KIT    | KIT_3_1     | 2027 |
| chr4  | 55564525  | 55564769  | KIT    | KIT_3_2     | 1306 |
| chr4  | 55565657  | 55565872  | KIT    | KIT_4_1     | 1681 |
| chr4  | 55565765  | 55565981  | KIT    | KIT_4_2     | 1606 |
| chr4  | 55569762  | 55570011  | KIT    | KIT_5_1     | 205  |
| chr4  | 55569881  | 55570096  | KIT    | KIT_5_2     | 2300 |
| chr4  | 55573148  | 55573392  | KIT    | KIT_6_1     | 1100 |
| chr4  | 55573282  | 55573516  | KIT    | KIT_6_2     | 1870 |
| chr4  | 55575514  | 55575763  | KIT    | KIT_7_1     | 619  |
| chr4  | 55589685  | 55589925  | KIT    | KIT_8_1     | 1804 |
| chr4  | 55591945  | 55592186  | KIT    | KIT_9_1     | 1305 |
| chr4  | 55592015  | 55592263  | KIT    | KIT_9_2     | 1154 |
| chr12 | 25398166  | 25398409  | KRAS   | KRAS_2_1    | 412  |
| chr12 | 25380030  | 25380274  | KRAS   | KRAS_3_1    | 104  |
| chr12 | 25380158  | 25380388  | KRAS   | KRAS_3_2    | 1038 |
| chr12 | 25378404  | 25378624  | KRAS   | KRAS_4_1    | 1035 |
| chr12 | 25378534  | 25378777  | KRAS   | KRAS_4_2    | 858  |
| chr5  | 170834641 | 170834865 | NPM1   | NPM1_ex10_1 | 1297 |
| chr5  | 170837475 | 170837718 | NPM1   | NPM1_ex11_1 | 664  |
| chr1  | 115258607 | 115258834 | NRAS   | NRAS_2_4    | 1688 |
| chr1  | 115256345 | 115256569 | NRAS   | NRAS_3_1    | 2585 |
| chr1  | 115256425 | 115256648 | NRAS   | NRAS_3_2    | 246  |
| chr4  | 55140956  | 55141194  | PDFGRA | PDFGRA_12_1 | 1444 |
| chr4  | 55144006  | 55144255  | PDFGRA | PDFGRA_14_1 | 1378 |
| chr4  | 55151953  | 55152176  | PDFGRA | PDFGRA_18_1 | 1754 |
| chrX  | 133559180 | 133559401 | PHF6   | PHF6_10_1   | 1652 |
| chrX  | 133511574 | 133511822 | PHF6   | PHF6_2_1    | 985  |
| chrX  | 133527442 | 133527657 | PHF6   | PHF6_4_1    | 1209 |
| chrX  | 133527523 | 133527761 | PHF6   | PHF6_4_2    | 794  |
| chrX  | 133527852 | 133528096 | PHF6   | PHF6_5_1    | 61   |
| chrX  | 133547703 | 133547939 | PHF6   | PHF6_7_3    | 652  |
| chrX  | 133547826 | 133548072 | PHF6   | PHF6_7_4    | 517  |
| chrX  | 133548947 | 133549195 | PHF6   | PHF6_8_1    | 225  |
| chrX  | 133551166 | 133551396 | PHF6   | PHF6_9_1    | 1318 |
| chr10 | 89624181  | 89624400  | PTEN   | PTEN_1_1    | 1903 |
| chr10 | 89692646  | 89692875  | PTEN   | PTEN_5_1    | 934  |
| chr10 | 89692798  | 89693047  | PTEN   | PTEN_5_2    | 1434 |
| chr10 | 89717566  | 89717800  | PTEN   | PTEN_7_1    | 1384 |
| chr10 | 89717699  | 89717915  | PTEN   | PTEN_7_2    | 1161 |
| chr10 | 89720550  | 89720789  | PTEN   | PTEN_8_1    | 139  |

|       |           |           |        |               |      |
|-------|-----------|-----------|--------|---------------|------|
| chr10 | 89720693  | 89720932  | PTEN   | PTEN_8_2      | 871  |
| chr12 | 112926779 | 112927028 | PTPN11 | PTPN11_ex13_1 | 1054 |
| chr12 | 112888067 | 112888316 | PTPN11 | PTPN11_ex3_1  | 1382 |
| chr12 | 112888130 | 112888375 | PTPN11 | PTPN11_ex3_2  | 2012 |
| chr12 | 112915373 | 112915619 | PTPN11 | PTPN11_ex8_1  | 741  |
| chr12 | 112915597 | 112915845 | PTPN11 | PTPN11_ex9_1  | 989  |
| chr12 | 112915677 | 112915894 | PTPN11 | PTPN11_ex9_2  | 2378 |
| chr21 | 36259031  | 36259263  | RUNX1  | RUNX1_1_6     | 1632 |
| chr21 | 36259188  | 36259429  | RUNX1  | RUNX1_1_7     | 1995 |
| chr21 | 36252795  | 36253038  | RUNX1  | RUNX1_2_1     | 1462 |
| chr21 | 36231678  | 36231919  | RUNX1  | RUNX1_3_1     | 2134 |
| chr21 | 36206617  | 36206863  | RUNX1  | RUNX1_4_1     | 617  |
| chr21 | 36206757  | 36206993  | RUNX1  | RUNX1_4_2     | 619  |
| chr21 | 36171562  | 36171810  | RUNX1  | RUNX1_5_1     | 1314 |
| chr21 | 36160020  | 36160264  | RUNX1  | RUNX1_6_1     | 1444 |
| chr21 | 36161185  | 36161410  | RUNX1  | RUNX1_6_10    | 1572 |
| chr21 | 36161248  | 36161463  | RUNX1  | RUNX1_6_11    | 2230 |
| chr21 | 36161393  | 36161639  | RUNX1  | RUNX1_6_12    | 1042 |
| chr21 | 36161513  | 36161737  | RUNX1  | RUNX1_6_13    | 1252 |
| chr21 | 36161665  | 36161914  | RUNX1  | RUNX1_6_14    | 326  |
| chr21 | 36161829  | 36162078  | RUNX1  | RUNX1_6_15    | 479  |
| chr21 | 36161993  | 36162220  | RUNX1  | RUNX1_6_16    | 1333 |
| chr21 | 36162106  | 36162329  | RUNX1  | RUNX1_6_17    | 1127 |
| chr21 | 36162260  | 36162502  | RUNX1  | RUNX1_6_18    | 847  |
| chr21 | 36162443  | 36162675  | RUNX1  | RUNX1_6_19    | 30   |
| chr21 | 36160176  | 36160425  | RUNX1  | RUNX1_6_2     | 1610 |
| chr21 | 36162590  | 36162826  | RUNX1  | RUNX1_6_20    | 550  |
| chr21 | 36162727  | 36162974  | RUNX1  | RUNX1_6_21    | 1627 |
| chr21 | 36162885  | 36163134  | RUNX1  | RUNX1_6_22    | 770  |
| chr21 | 36163042  | 36163285  | RUNX1  | RUNX1_6_23    | 1106 |
| chr21 | 36163236  | 36163462  | RUNX1  | RUNX1_6_24    | 1972 |
| chr21 | 36163331  | 36163570  | RUNX1  | RUNX1_6_25    | 804  |
| chr21 | 36163482  | 36163726  | RUNX1  | RUNX1_6_26    | 42   |
| chr21 | 36163666  | 36163915  | RUNX1  | RUNX1_6_27    | 1    |
| chr21 | 36163758  | 36163975  | RUNX1  | RUNX1_6_28    | 3    |
| chr21 | 36163891  | 36164119  | RUNX1  | RUNX1_6_29    | 641  |
| chr21 | 36160333  | 36160566  | RUNX1  | RUNX1_6_3     | 1252 |
| chr21 | 36164011  | 36164258  | RUNX1  | RUNX1_6_30    | 146  |
| chr21 | 36164079  | 36164294  | RUNX1  | RUNX1_6_32    | 753  |
| chr21 | 36164236  | 36164451  | RUNX1  | RUNX1_6_33    | 3    |
| chr21 | 36164236  | 36164482  | RUNX1  | RUNX1_6_35    | 0    |
| chr21 | 36164342  | 36164580  | RUNX1  | RUNX1_6_36    | 7    |
| chr21 | 36164424  | 36164642  | RUNX1  | RUNX1_6_38    | 719  |
| chr21 | 36164467  | 36164699  | RUNX1  | RUNX1_6_39    | 1106 |
| chr21 | 36160483  | 36160732  | RUNX1  | RUNX1_6_4     | 857  |
| chr21 | 36164617  | 36164843  | RUNX1  | RUNX1_6_41    | 1617 |
| chr21 | 36164728  | 36164953  | RUNX1  | RUNX1_6_43    | 2580 |
| chr21 | 36160624  | 36160851  | RUNX1  | RUNX1_6_5     | 580  |
| chr21 | 36160716  | 36160962  | RUNX1  | RUNX1_6_6     | 318  |
| chr21 | 36160821  | 36161020  | RUNX1  | RUNX1_6_7     | 90   |
| chr21 | 36160940  | 36161158  | RUNX1  | RUNX1_6_8     | 1587 |
| chr21 | 36161054  | 36161270  | RUNX1  | RUNX1_6_9     | 1400 |
| chr2  | 198267134 | 198267383 | SF3b1  | SF3b1_14_1    | 539  |
| chr2  | 198267302 | 198267540 | SF3b1  | SF3b1_14_2    | 2395 |
| chr2  | 198267361 | 198267588 | SF3b1  | SF3b1_14_3    | 2019 |
| chr2  | 198266592 | 198266833 | SF3b1  | SF3b1_15_1    | 525  |
| chr2  | 198266721 | 198266957 | SF3b1  | SF3b1_15_2    | 988  |
| chr2  | 198266399 | 198266616 | SF3b1  | SF3b1_16_1    | 457  |

|       |           |           |       |              |      |
|-------|-----------|-----------|-------|--------------|------|
| chr2  | 198266496 | 198266743 | SF3b1 | SF3b1_16_2   | 189  |
| chrX  | 53432360  | 53432608  | SMC1A | SMC1A_ex11_1 | 1360 |
| chrX  | 53432408  | 53432651  | SMC1A | SMC1A_ex11_2 | 1607 |
| chrX  | 53431881  | 53432117  | SMC1A | SMC1A_ex13_1 | 2045 |
| chrX  | 53430422  | 53430657  | SMC1A | SMC1A_ex15_1 | 1096 |
| chrX  | 53426455  | 53426681  | SMC1A | SMC1A_ex16_1 | 2657 |
| chrX  | 53423341  | 53423572  | SMC1A | SMC1A_ex17_1 | 1758 |
| chrX  | 53423089  | 53423338  | SMC1A | SMC1A_ex18_1 | 1319 |
| chrX  | 53421613  | 53421844  | SMC1A | SMC1A_ex19_1 | 42   |
| chrX  | 53409097  | 53409342  | SMC1A | SMC1A_ex22_1 | 1722 |
| chrX  | 53407479  | 53407716  | SMC1A | SMC1A_ex24_1 | 1850 |
| chrX  | 53440148  | 53440382  | SMC1A | SMC1A_ex4_1  | 1354 |
| chrX  | 53438830  | 53439075  | SMC1A | SMC1A_ex6_1  | 1273 |
| chrX  | 53438637  | 53438879  | SMC1A | SMC1A_ex7_1  | 892  |
| chr10 | 112343004 | 112343250 | SMC3  | SMC3_ex11_1  | 1185 |
| chr10 | 112343146 | 112343381 | SMC3  | SMC3_ex11_2  | 2558 |
| chr10 | 112343523 | 112343759 | SMC3  | SMC3_ex12_1  | 1098 |
| chr10 | 112343847 | 112344094 | SMC3  | SMC3_ex13_1  | 1206 |
| chr10 | 112356060 | 112356282 | SMC3  | SMC3_ex19_1  | 892  |
| chr10 | 112356153 | 112356369 | SMC3  | SMC3_ex19_2  | 1814 |
| chr10 | 112361612 | 112361861 | SMC3  | SMC3_ex25_1  | 486  |
| chr10 | 112361779 | 112361994 | SMC3  | SMC3_ex25_2  | 1291 |
| chr9  | 72933602  | 72933822  | SMC5  | SMC5_ex15_1  | 101  |
| chr9  | 72933743  | 72933981  | SMC5  | SMC5_ex15_2  | 1083 |
| chr9  | 72938809  | 72939058  | SMC5  | SMC5_ex17_2  | 206  |
| chr9  | 72938912  | 72939149  | SMC5  | SMC5_ex17_3  | 892  |
| chr9  | 72939017  | 72939246  | SMC5  | SMC5_ex17_4  | 334  |
| chr9  | 72961917  | 72962164  | SMC5  | SMC5_ex20_1  | 466  |
| chr9  | 72962725  | 72962940  | SMC5  | SMC5_ex22_1  | 601  |
| chr9  | 72962856  | 72963105  | SMC5  | SMC5_ex22_2  | 14   |
| chr9  | 72964940  | 72965168  | SMC5  | SMC5_ex23_1  | 1174 |
| chr9  | 72965071  | 72965298  | SMC5  | SMC5_ex23_2  | 1797 |
| chr17 | 74732803  | 74733040  | SRSF2 | SRSF2_1_1_1  | 483  |
| chr17 | 74732965  | 74733210  | SRSF2 | SRSF2_1_1_2  | 1607 |
| chr17 | 74733077  | 74733308  | SRSF2 | SRSF2_1_1_3  | 2067 |
| chr17 | 74733227  | 74733459  | SRSF2 | SRSF2_1_1_4  | 2049 |
| chrX  | 123197579 | 123197828 | STAG2 | STAG2_20_1   | 413  |
| chrX  | 123197701 | 123197944 | STAG2 | STAG2_20_2   | 431  |
| chrX  | 123217168 | 123217399 | STAG2 | STAG2_29_1   | 492  |
| chrX  | 123217261 | 123217490 | STAG2 | STAG2_29_2   | 906  |
| chrX  | 123220280 | 123220502 | STAG2 | STAG2_30_1   | 1989 |
| chrX  | 123220430 | 123220677 | STAG2 | STAG2_30_2   | 315  |
| chr4  | 106193655 | 106193871 | TET2  | TET2_10_1    | 2610 |
| chr4  | 106193777 | 106194026 | TET2  | TET2_10_2    | 1751 |
| chr4  | 106193887 | 106194135 | TET2  | TET2_10_3    | 868  |
| chr4  | 106196139 | 106196382 | TET2  | TET2_11_1    | 793  |
| chr4  | 106197178 | 106197419 | TET2  | TET2_11_10   | 1695 |
| chr4  | 106197259 | 106197504 | TET2  | TET2_11_11   | 1615 |
| chr4  | 106197335 | 106197574 | TET2  | TET2_11_12   | 1419 |
| chr4  | 106197475 | 106197721 | TET2  | TET2_11_13   | 1428 |
| chr4  | 106197624 | 106197862 | TET2  | TET2_11_14   | 1395 |
| chr4  | 106197780 | 106198029 | TET2  | TET2_11_15   | 315  |
| chr4  | 106197840 | 106198070 | TET2  | TET2_11_16   | 476  |
| chr4  | 106198003 | 106198238 | TET2  | TET2_11_17   | 1365 |
| chr4  | 106198117 | 106198356 | TET2  | TET2_11_18   | 783  |
| chr4  | 106198234 | 106198470 | TET2  | TET2_11_19   | 848  |
| chr4  | 106196304 | 106196541 | TET2  | TET2_11_2    | 2235 |
| chr4  | 106198365 | 106198609 | TET2  | TET2_11_20   | 180  |

|      |           |           |      |            |      |
|------|-----------|-----------|------|------------|------|
| chr4 | 106198432 | 106198652 | TET2 | TET2_11_21 | 258  |
| chr4 | 106198561 | 106198776 | TET2 | TET2_11_22 | 1302 |
| chr4 | 106198728 | 106198976 | TET2 | TET2_11_23 | 1248 |
| chr4 | 106198792 | 106199034 | TET2 | TET2_11_24 | 1129 |
| chr4 | 106198952 | 106199198 | TET2 | TET2_11_25 | 2016 |
| chr4 | 106199141 | 106199387 | TET2 | TET2_11_26 | 0    |
| chr4 | 106199223 | 106199469 | TET2 | TET2_11_27 | 0    |
| chr4 | 106199390 | 106199605 | TET2 | TET2_11_28 | 1036 |
| chr4 | 106199507 | 106199747 | TET2 | TET2_11_29 | 147  |
| chr4 | 106196432 | 106196680 | TET2 | TET2_11_3  | 1259 |
| chr4 | 106199652 | 106199885 | TET2 | TET2_11_30 | 214  |
| chr4 | 106199726 | 106199956 | TET2 | TET2_11_31 | 380  |
| chr4 | 106199852 | 106200095 | TET2 | TET2_11_32 | 1159 |
| chr4 | 106200045 | 106200286 | TET2 | TET2_11_33 | 674  |
| chr4 | 106200156 | 106200404 | TET2 | TET2_11_34 | 788  |
| chr4 | 106200320 | 106200558 | TET2 | TET2_11_35 | 569  |
| chr4 | 106200470 | 106200706 | TET2 | TET2_11_36 | 1161 |
| chr4 | 106200617 | 106200833 | TET2 | TET2_11_37 | 1267 |
| chr4 | 106200746 | 106200983 | TET2 | TET2_11_38 | 66   |
| chr4 | 106200866 | 106201113 | TET2 | TET2_11_39 | 25   |
| chr4 | 106196565 | 106196788 | TET2 | TET2_11_4  | 2022 |
| chr4 | 106196691 | 106196912 | TET2 | TET2_11_5  | 2056 |
| chr4 | 106196754 | 106196976 | TET2 | TET2_11_6  | 2368 |
| chr4 | 106196885 | 106197110 | TET2 | TET2_11_7  | 2479 |
| chr4 | 106197045 | 106197294 | TET2 | TET2_11_8  | 1312 |
| chr4 | 106197099 | 106197348 | TET2 | TET2_11_9  | 1236 |
| chr4 | 106154923 | 106155165 | TET2 | TET2_3_1   | 287  |
| chr4 | 106156339 | 106156580 | TET2 | TET2_3_10  | 1968 |
| chr4 | 106156496 | 106156731 | TET2 | TET2_3_11  | 3287 |
| chr4 | 106156624 | 106156873 | TET2 | TET2_3_12  | 1568 |
| chr4 | 106156795 | 106157031 | TET2 | TET2_3_13  | 2224 |
| chr4 | 106156947 | 106157174 | TET2 | TET2_3_14  | 2935 |
| chr4 | 106157101 | 106157342 | TET2 | TET2_3_15  | 1473 |
| chr4 | 106157245 | 106157488 | TET2 | TET2_3_16  | 1101 |
| chr4 | 106157388 | 106157627 | TET2 | TET2_3_17  | 1556 |
| chr4 | 106157509 | 106157758 | TET2 | TET2_3_18  | 1811 |
| chr4 | 106157670 | 106157919 | TET2 | TET2_3_19  | 2741 |
| chr4 | 106155100 | 106155324 | TET2 | TET2_3_2   | 2217 |
| chr4 | 106157841 | 106158080 | TET2 | TET2_3_20  | 1455 |
| chr4 | 106157921 | 106158168 | TET2 | TET2_3_21  | 1577 |
| chr4 | 106158087 | 106158319 | TET2 | TET2_3_22  | 2927 |
| chr4 | 106158142 | 106158391 | TET2 | TET2_3_23  | 2165 |
| chr4 | 106158304 | 106158548 | TET2 | TET2_3_24  | 1218 |
| chr4 | 106155248 | 106155477 | TET2 | TET2_3_3   | 2736 |
| chr4 | 106155401 | 106155633 | TET2 | TET2_3_4   | 1749 |
| chr4 | 106155553 | 106155789 | TET2 | TET2_3_5   | 1189 |
| chr4 | 106155711 | 106155942 | TET2 | TET2_3_6   | 2483 |
| chr4 | 106155864 | 106156112 | TET2 | TET2_3_7   | 1961 |
| chr4 | 106156042 | 106156290 | TET2 | TET2_3_8   | 1110 |
| chr4 | 106156190 | 106156425 | TET2 | TET2_3_9   | 1582 |
| chr4 | 106162419 | 106162667 | TET2 | TET2_4_1   | 518  |
| chr4 | 106163873 | 106164112 | TET2 | TET2_5_1   | 990  |
| chr4 | 106164658 | 106164880 | TET2 | TET2_6_1   | 1963 |
| chr4 | 106164737 | 106164979 | TET2 | TET2_6_2   | 1857 |
| chr4 | 106180721 | 106180965 | TET2 | TET2_7_1   | 1566 |
| chr4 | 106182802 | 106183001 | TET2 | TET2_8_2   | 206  |
| chr4 | 106182855 | 106183070 | TET2 | TET2_8_4   | 385  |
| chr4 | 106190625 | 106190860 | TET2 | TET2_9_1   | 943  |

|       |           |           |       |             |      |
|-------|-----------|-----------|-------|-------------|------|
| chr4  | 106190769 | 106190984 | TET2  | TET2_9_2    | 1790 |
| chr17 | 7573848   | 7574065   | TP53  | TP53_10_1   | 2354 |
| chr17 | 7572225   | 7572469   | TP53  | TP53_11_10  | 822  |
| chr17 | 7572369   | 7572607   | TP53  | TP53_11_11  | 1694 |
| chr17 | 7572530   | 7572763   | TP53  | TP53_11_12  | 1957 |
| chr17 | 7572671   | 7572920   | TP53  | TP53_11_13  | 778  |
| chr17 | 7572812   | 7573049   | TP53  | TP53_11_14  | 648  |
| chr17 | 7571643   | 7571869   | TP53  | TP53_11_2   | 1017 |
| chr17 | 7571767   | 7572013   | TP53  | TP53_11_3   | 693  |
| chr17 | 7571817   | 7572033   | TP53  | TP53_11_5   | 1852 |
| chr17 | 7572006   | 7572211   | TP53  | TP53_11_6   | 76   |
| chr17 | 7572009   | 7572258   | TP53  | TP53_11_7   | 53   |
| chr17 | 7572174   | 7572392   | TP53  | TP53_11_8   | 2102 |
| chr17 | 7579755   | 7579972   | TP53  | TP53_2_1    | 1144 |
| chr17 | 7579547   | 7579777   | TP53  | TP53_3_1    | 926  |
| chr17 | 7579259   | 7579508   | TP53  | TP53_4_1    | 924  |
| chr17 | 7579378   | 7579618   | TP53  | TP53_4_2    | 623  |
| chr17 | 7578253   | 7578502   | TP53  | TP53_5_1    | 1381 |
| chr17 | 7578360   | 7578608   | TP53  | TP53_5_2    | 1639 |
| chr17 | 7578089   | 7578320   | TP53  | TP53_6_1    | 1943 |
| chr17 | 7577428   | 7577671   | TP53  | TP53_7_1    | 2954 |
| chr17 | 7576957   | 7577194   | TP53  | TP53_8_1    | 1995 |
| chr17 | 7576753   | 7576978   | TP53  | TP53_9_1    | 2588 |
| chr21 | 44524292  | 44524535  | U2AF1 | U2AF1_1_1   | 895  |
| chr21 | 44514679  | 44514928  | U2AF1 | U2AF1_5_1   | 1656 |
| chr11 | 32417742  | 32417986  | WT1   | WT1_7_1     | 1138 |
| chr11 | 32413390  | 32413637  | WT1   | WT1_9_1     | 1234 |
| chrX  | 15821728  | 15821950  | ZRSR2 | ZRSR2_ex4_1 | 1333 |
| chrX  | 15822159  | 15822392  | ZRSR2 | ZRSR2_ex5_1 | 1874 |

**Supplemental Table S1B. 9I cb`Wtj YfUj YcZUa d`JWb`dUbY**

| Gene   | Total Exon Count | No. of exons in gene | No. of exons covered by our panel | Exon(s) covered        |
|--------|------------------|----------------------|-----------------------------------|------------------------|
| ASXL1  | 12               | 12                   | 1                                 | 12                     |
| BCOR   | 15               | 14                   | 4                                 | 4 (partial), 8, 12, 15 |
| CBL    | 16               | 16                   | 6                                 | 5, 7-10, 12            |
| CDKN2A | 3                | 2                    | 2                                 | 1, 2                   |
| CSF1R  | 22               | 21                   | 8                                 | 3,4,7,9,12,17,21,22    |
| CUX1   | 24               | 24                   | 2                                 | 6, 22                  |
| DNMT3A | 23               | 22                   | 10                                | 7-9, 17-23             |
| ETV6   | 8                | 8                    | 4                                 | 3, 5, 6, 7             |
| EZH2   | 20               | 19                   | 1                                 | 16                     |
| FLT3   | 24               | 24                   | 10                                | 3-6, 8, 12-16          |
| GATA1  | 6                | 5                    | 2                                 | 2, 3                   |
| IDH1   | 10               | 8                    | 4                                 | 4, 5, 8, 9             |
| IDH2   | 11               | 11                   | 2                                 | 4, 8                   |
| JAK2   | 25               | 23                   | 3                                 | 12-14                  |
| KIT    | 21               | 21                   | 20                                | 2-21                   |
| KRAS   | 6                | 4                    | 3                                 | 2, 3, 4                |
| NPM1   | 11               | 11                   | 2                                 | 10, 11                 |
| NRAS   | 7                | 4                    | 2                                 | 2, 3                   |
| PDGFRA | 23               | 22                   | 3                                 | 12, 14, 18             |
| PHF6   | 10               | 9                    | 5                                 | 4, 5, 7, 8, 9          |
| PTEN   | 9                | 9                    | 4                                 | 1, 5, 7, 8             |
| PTPN11 | 16               | 15                   | 4                                 | 3, 8, 9, 13            |
| RUNX1  | 9                | 8                    | 6                                 | 3-9                    |
| SF3B1  | 25               | 25                   | 3                                 | 14-16                  |

|       |    |    |    |                                |
|-------|----|----|----|--------------------------------|
| SMC1A | 25 | 25 | 12 | 4, 6, 7, 11, 13, 15-19, 22, 24 |
| SMC3  | 29 | 29 | 5  | 11-13, 19, 25                  |
| SMC5  | 25 | 25 | 5  | 15, 17, 20, 22, 23             |
| SRSF2 | 3  | 2  | 1  | 1                              |
| STAG2 | 35 | 33 | 3  | 20, 29, 30                     |
| TET2  | 11 | 9  | 9  | 3-11                           |
| TP53  | 11 | 8  | 10 | 2-11                           |
| U2AF1 | 8  | 8  | 2  | 2, 6                           |
| WT1   | 10 | 10 | 2  | 7, 9                           |
| ZRSR2 | 11 | 11 | 2  | 4, 5                           |

**Supplemental Table S1C. : @H`#8`XYH`Wjcb`VmiWUdJ`Ufni`YWfcd\ cfYgJg`UbX`B; G`**

| Patient ID |          | Genescan Capillary Electrophoresis | Detection by NGS and VAF% |
|------------|----------|------------------------------------|---------------------------|
| 1          | FLT3 ITD | detected                           | 15.22%                    |
| 2          | FLT3 ITD | detected                           | not detected              |
| 3          | FLT3 ITD | detected                           | 8.92%                     |
| 4          | FLT3 ITD | detected                           | not detected              |
| 6          | FLT3 ITD | detected                           | not detected              |
| 7          | FLT3 ITD | detected                           | not detected              |
| 10         | FLT3 ITD | detected                           | 42.32%                    |
| 14         | FLT3 ITD | detected                           | 14.20%                    |
| 15         | FLT3 ITD | detected                           | not detected              |
| 17         | FLT3 ITD | detected                           | 1.12%                     |
| 21         | FLT3 ITD | detected                           | 50.14%                    |
| 23         | FLT3 ITD | detected                           | not detected              |
| 25         | FLT3 ITD | detected                           | not detected              |
| 27         | FLT3 ITD | detected                           | not detected              |
| 29         | FLT3 ITD | detected                           | not detected              |
| 31         | FLT3 ITD | detected                           | 5.27%                     |
| 33         | FLT3 ITD | detected                           | 16.24%                    |
| 37         | FLT3 ITD | detected                           | 40.18%                    |
| 40         | FLT3 ITD | detected                           | 29.62%                    |
| 41         | FLT3 ITD | detected                           | 40.22%                    |
| 45         | FLT3 ITD | detected                           | 59.27%                    |
| 49         | FLT3 ITD | detected                           | not detected              |
| 51         | FLT3 ITD | detected                           | not detected              |
| 53         | FLT3 ITD | detected                           | 22.63%                    |
| 54         | FLT3 ITD | detected                           | not detected              |
| 56         | FLT3 ITD | detected                           | 23.02%                    |
| 60         | FLT3 ITD | detected                           | not detected              |
| 61         | FLT3 ITD | detected                           | 33.50%                    |
| 68         | FLT3 ITD | detected                           | not detected              |
| 71         | FLT3 ITD | detected                           | 18.04%                    |
| 76         | FLT3 ITD | detected                           | not detected              |
| 77         | FLT3 ITD | detected                           | 36.47%                    |
| 79         | FLT3 ITD | detected                           | not detected              |
| 81         | FLT3 ITD | detected                           | not detected              |
| 82         | FLT3 ITD | detected                           | 33.41%                    |
| 85         | FLT3 ITD | detected                           | 16.85%                    |
| 87         | FLT3 ITD | detected                           | 49.64%                    |
| 93         | FLT3 ITD | detected                           | 17.07%                    |
| 95         | FLT3 ITD | detected                           | 10.61%                    |
| 104        | FLT3 ITD | detected                           | 39.60%                    |
| 106        | FLT3 ITD | detected                           | 8.74%                     |
| 111        | FLT3 ITD | detected                           | 6.94%                     |
| 113        | FLT3 ITD | detected                           | 5.70%                     |



**Supplemental Table S1D. 'XXD7 F 'df]a Yfg'UbX'dfcVYg**

| Variant      | ddPCR forward primer 5' - 3' | ddPCR reverse primer 5' - 3' | ddPCR wild type probe 5' HEX - sequence - 3' BHQ-1                | ddPCR mutant probe 5' 6-FAM - sequence - 3' BHQ-1                  |
|--------------|------------------------------|------------------------------|-------------------------------------------------------------------|--------------------------------------------------------------------|
| NRAS Q61R    | CAA ATA CAC AGA GGA AGC C    | GGT GAA ACC TGT TTG TTG GAC  | /5'HEX/ CTG TAC TCT TCT <u>T</u> GT CCA GCT G /3'BHQ-1/           | /5'6-FAM/ TG TAC TCT TCT <u>C</u> GT CCA GCT G /3'BHQ-1/           |
| NRAS Q61K    | CAA ATA CAC AGA GGA AGC C    | GGT GAA ACC TGT TTG TTG GAC  | /5'HEX/ CTG TAC TCT TCT T <u>G</u> T CCA GCT G /3'BHQ-1/          | /5'6-FAM/ A CTG TAC TCT TCT T <u>T</u> T CCA GCT G /3'BHQ-1/       |
| IDH2 R140Q   | TTG CAG ATG ATG GGC TC       | CTC ACA GAG TTC AAG CTG      | /5'HEX/ TGG AAC TAT CC <u>G</u> GAA CAT CCT G /3'BHQ-1/           | /5'6-FAM/ TGG AAC TAT CC <u>A</u> GAA CAT CCT GG /3'BHQ-1/         |
| SRSF2 P95R   | CGT TTA CCT GCG GCT C        | CTG AGG ACG CTA TGG ATG      | /5'HEX/ CGC C <u>C</u> C CCG GAC TCA CA /3'BHQ-1/                 | /5'6-FAM/ CGC C <u>G</u> C CCG GAC TCA C /3'BHQ-1/                 |
| DNMT3A G706W | GTT GAC GAT GGA GAG GTC      | CCT TTA TCC TCC CAG ATC C    | /5'HEX/ CTG CCC C <u>C</u> A ATC ACC AGA TC /3'BHQ-1/             | /5'6-FAM/ CTG CCC C <u>A</u> A ATC ACC AGA TC /3'BHQ-1/            |
| DNMT3A K826R | CCA GCA GAG GTT CTA GAC      | GTC TCT CTT CTG CCT CC       | /5'HEX/ CTG ACC <u>T</u> TG GCT ATC CTG C /3'BHQ-1/               | /5'6-FAM/ CTG ACC <u>C</u> TG GCT ATC CTG C /3'BHQ-1/              |
| TET2 Y867H   | GCA GGA AAC AAG ACC CAA AAC  | ACC TGT GAA GAA GAT CTT GC   | /5'HEX/ CAT GCA A <u>T</u> A TTT TCC AAA TAA TGT GAT CC /3'BHQ-1/ | /5'6-FAM/ CAT GCA A <u>C</u> A TTT TCC AAA TAA TGT GAT C /3'BHQ-1/ |
| TET2 P1723S  | CAG CAG TTG TAC CAT TAG ACC  | GAG GTG GCT CCC ATG AAG      | /5'HEX/ AAT TGC CT <u>C</u> CTT ATC CCA CTC ATG /3'BHQ-1/         | /5'6-FAM/ A AAT TGC CT <u>T</u> CTT ATC CCA CTC ATG /3'BHQ-1/      |





Supplemental Table S3A: called nucleotide variants detected by NGS at diagnosis (excluding *FLT3* ITD)

| Patient ID | Chr   | Start     | End       | reference               | alternative | Exon/<br>Intron | Gene   | Amino acid change | VAF%   | Exonic Function        | dbSNP<br>Identifier | Cosmic identifier (v.68)                               | Notes for inclusion                                                                                                       |
|------------|-------|-----------|-----------|-------------------------|-------------|-----------------|--------|-------------------|--------|------------------------|---------------------|--------------------------------------------------------|---------------------------------------------------------------------------------------------------------------------------|
| 1          | chr5  | 170837547 | 170837547 | -                       | TCTG        | exonic          | NPM1   | W288fs            | 38.95% | frameshift insertion   |                     | COSM17559                                              | Previously reported in haematopoietic samples in COSMIC database                                                          |
| 2          | chr5  | 170837547 | 170837547 | -                       | CTTG        | exonic          | NPM1   | W288fs            | 48.46% | frameshift insertion   |                     | COSM20811                                              | Previously reported in haematopoietic samples in COSMIC database                                                          |
| 2          | chr2  | 209113113 | 209113113 | G                       | C           | exonic          | IDH1   | R132G             | 21.01% | nonsynonymous SNV      |                     | COSM28749                                              | Previously reported in haematopoietic samples in COSMIC database                                                          |
| 2          | chr5  | 149433888 | 149433888 | C                       | G           | exonic          | CSF1R  | E920D             | 50.77% | nonsynonymous SNV      | rs34030164          |                                                        | Previously reported in human variation database frequency less than 0.14%                                                 |
| 3          | chr2  | 25469933  | 25469933  | T                       | -           | exonic          | DNMT3A | Y370fs            | 46.11% | frameshift deletion    |                     |                                                        | frameshift indel, nonsense or splicing variant                                                                            |
| 3          | chr5  | 170837547 | 170837547 | -                       | TCTG        | exonic          | NPM1   | W288fs            | 36.11% | frameshift insertion   |                     | COSM17559                                              | Previously reported in haematopoietic samples in COSMIC database                                                          |
| 3          | chr15 | 90631934  | 90631934  | C                       | T           | exonic          | IDH2   | R140Q             | 41.31% | nonsynonymous SNV      | rs121913502         | COSM41590                                              | Previously reported in haematopoietic samples in COSMIC database, human variation database frequency less than 0.14%      |
| 4          | chr2  | 209113112 | 209113112 | C                       | T           | exonic          | IDH1   | R132H             | 37.64% | nonsynonymous SNV      | rs121913500         | COSM28746                                              | Previously reported in haematopoietic samples in COSMIC database, human variation database frequency less than 0.14%      |
| 5          | chr20 | 31022712  | 31022712  | C                       | T           | exonic          | ASXL1  | Q733X             | 38.96% | stopgain               |                     | COSM1318847                                            | Previously reported in haematopoietic samples in COSMIC database                                                          |
| 5          | chr17 | 74732959  | 74732959  | G                       | T           | exonic          | SRSF2  | P95H              | 56.87% | nonsynonymous SNV      |                     | COSM211505,COSM211029,COSM211504                       | Previously reported in haematopoietic samples in COSMIC database                                                          |
| 6          | chr21 | 36171599  | 36171599  | -                       | GA          | exonic          | RUNX1  | S322fs            | 24.74% | frameshift insertion   |                     |                                                        | Frameshift indel detected in Papaemmanuil NEJM 2016 in same codon                                                         |
| 6          | chr21 | 36206899  | 36206899  | C                       | T           | splicing        | RUNX1  | splicing          | 31.76% | Splicing               |                     |                                                        | frameshift indel, nonsense or splicing variant                                                                            |
| 6          | chr17 | 74732959  | 74732959  | G                       | T           | exonic          | SRSF2  | P95H              | 58.35% | nonsynonymous SNV      |                     | COSM211505,COSM211029,COSM211504                       | Previously reported in haematopoietic samples in COSMIC database                                                          |
| 6          | chr11 | 119148875 | 119148875 | G                       | C           | splicing        | CBL    | splicing          | 40.02% | Splicing               |                     | COSM34063                                              | Previously reported in haematopoietic samples in COSMIC database                                                          |
| 6          | chr2  | 209113113 | 209113113 | G                       | A           | exonic          | IDH1   | R132C             | 19.33% | nonsynonymous SNV      | rs121913499         | COSM28747                                              | Previously reported in haematopoietic samples in COSMIC database, human variation database frequency less than 0.14%      |
| 7          | chr5  | 170837547 | 170837547 | -                       | TCTG        | exonic          | NPM1   | W288fs            | 34.58% | frameshift insertion   |                     | COSM17559                                              | Previously reported in haematopoietic samples in COSMIC database                                                          |
| 7          | chr2  | 209113112 | 209113112 | C                       | T           | exonic          | IDH1   | R132H             | 41.72% | nonsynonymous SNV      | rs121913500         | COSM28746                                              | Previously reported in haematopoietic samples in COSMIC database, human variation database frequency less than 0.14%      |
| 7          | chr1  | 115258744 | 115258744 | C                       | T           | exonic          | NRAS   | G13D              | 10.84% | nonsynonymous SNV      | rs121434596         | COSM573                                                | Previously reported in haematopoietic samples in COSMIC database, human variation database frequency less than 0.14%      |
| 7          | chr13 | 28592642  | 28592642  | C                       | A           | exonic          | FLT3   | D835Y             | 22.88% | nonsynonymous SNV      | rs121913488         | COSM783                                                | Previously reported in haematopoietic samples in COSMIC database, human variation database frequency less than 0.14%      |
| 7          | chr2  | 25470590  | 25470590  | A                       | T           | exonic          | DNMT3A | L295Q             | 38.75% | nonsynonymous SNV      |                     |                                                        | Somatic mutation documented in haematopoietic sample in COSMIC within 1 codon COSM4383605 V296L                           |
| 8          | chr17 | 74732959  | 74732959  | G                       | A           | exonic          | SRSF2  | P95L              | 11.35% | nonsynonymous SNV      |                     | COSM146288,COSM211506,COSM211028                       | Previously reported in haematopoietic samples in COSMIC database                                                          |
| 8          | chr15 | 90631934  | 90631934  | C                       | T           | exonic          | IDH2   | R140Q             | 41.76% | nonsynonymous SNV      | rs121913502         | COSM41590                                              | Previously reported in haematopoietic samples in COSMIC database, human variation database frequency less than 0.14%      |
| 8          | chr11 | 119145633 | 119145633 | G                       | A           | exonic          | CBL    | R280Q             | 27.72% | nonsynonymous SNV      | rs145155035         |                                                        | Previously reported in human variation database frequency less than 0.14%                                                 |
| 9          | chr15 | 90631934  | 90631934  | C                       | T           | exonic          | IDH2   | R140Q             | 37.94% | nonsynonymous SNV      | rs121913502         | COSM41590                                              | Previously reported in haematopoietic samples in COSMIC database, human variation database frequency less than 0.14%      |
| 11         | chr21 | 36252922  | 36252922  | -                       | TGGGAAAA    | exonic          | RUNX1  | A147fs            | 35.43% | frameshift insertion   |                     | COSM1717871                                            | Previously reported in non-haematopoietic sample in COSMIC database, insertion detected within 1 codon COSM1717871 T148fs |
| 11         | chr7  | 148508788 | 148508788 | C                       | T           | exonic          | EZH2   | V626M             | 36.22% | nonsynonymous SNV      |                     | COSM1000723                                            | Previously reported in haematopoietic samples in COSMIC database                                                          |
| 11         | chr12 | 112926887 | 112926887 | G                       | A           | exonic          | PTPN11 | G503R             | 44.67% | nonsynonymous SNV      |                     | COSM14259                                              | Previously reported in haematopoietic samples in COSMIC database                                                          |
| 12         | chr12 | 112888165 | 112888165 | G                       | T           | exonic          | PTPN11 | D61Y              | 11.37% | nonsynonymous SNV      |                     | COSM13011                                              | Previously reported in haematopoietic samples in COSMIC database                                                          |
| 12         | chr12 | 112926890 | 112926890 | A                       | G           | exonic          | PTPN11 | M504V             | 19.48% | nonsynonymous SNV      |                     | COSM4603683                                            | Previously reported in haematopoietic samples in COSMIC database                                                          |
| 12         | chr2  | 209113112 | 209113112 | C                       | T           | exonic          | IDH1   | R132H             | 23.58% | nonsynonymous SNV      | rs121913500         | COSM28746                                              | Previously reported in haematopoietic samples in COSMIC database, human variation database frequency less than 0.14%      |
| 13         | chr20 | 31022592  | 31022592  | C                       | T           | exonic          | ASXL1  | R693X             | 19.87% | stopgain               |                     | COSM51388                                              | Previously reported in haematopoietic samples in COSMIC database                                                          |
| 13         | chr17 | 7577539   | 7577539   | G                       | A           | exonic          | TP53   | R116W,TP53        | 9.48%  | nonsynonymous SNV      | rs121912651         | COSM120006,COSM120005,COSM1640831,COSM10656,COSM120007 | Previously reported in haematopoietic samples in COSMIC database, human variation database frequency less than 0.14%      |
| 14         | chr5  | 170837547 | 170837547 | -                       | TCTG        | exonic          | NPM1   | W288fs            | 39.27% | frameshift insertion   |                     | COSM17559                                              | Previously reported in haematopoietic samples in COSMIC database                                                          |
| 14         | chr2  | 25457242  | 25457242  | C                       | T           | exonic          | DNMT3A | R882H             | 45.43% | nonsynonymous SNV      | rs147001633         | COSM52944,COSM442676                                   | Previously reported in haematopoietic samples in COSMIC database, human variation database frequency less than 0.14%      |
| 14         | chr4  | 55598108  | 55598108  | T                       | A           | exonic          | KIT    | L765M             | 31.79% | nonsynonymous SNV      |                     |                                                        | Somatic mutation documented in haematopoietic sample in COSMIC within 3 codons COSM5496106 D768N                          |
| 15         | chr21 | 36252945  | 36252949  | GTTTT                   | -           | exonic          | RUNX1  | E138fs            | 35.89% | frameshift deletion    |                     |                                                        | Frameshift indel detected in Papaemmanuil NEJM 2016 in same codon                                                         |
| 15         | chrX  | 36259234  | 36259234  | G                       | -           | exonic          | RUNX1  | P86fs             | 7.63%  | frameshift deletion    |                     |                                                        | frameshift indel, nonsense or splicing variant                                                                            |
| 15         | chr20 | 31022403  | 31022425  | CACCACTGCCATAGAGAGCGCCG | -           | exonic          | ASXL1  | H630fs            | 58.04% | frameshift deletion    |                     | COSM51200                                              | Previously reported in haematopoietic samples in COSMIC database                                                          |
| 15         | chr2  | 209113113 | 209113113 | G                       | A           | exonic          | IDH1   | R132C             | 17.78% | nonsynonymous SNV      | rs121913499         | COSM28747                                              | Previously reported in haematopoietic samples in COSMIC database, human variation database frequency less than 0.14%      |
| 15         | chr21 | 36252943  | 36252943  | T                       | A           | exonic          | RUNX1  | Y140F             | 34.79% | nonsynonymous SNV      |                     |                                                        | Somatic mutation documented in haematopoietic sample in COSMIC within 1 codon COSM1690275 S141L                           |
| 16         | chr12 | 11992215  | 11992220  | TTGCCT                  | -           | exonic          | ETV6   | 102_104del        | 53.55% | nonframeshift deletion |                     |                                                        | frameshift indel, nonsense or splicing variant                                                                            |
| 16         | chr12 | 112888210 | 112888210 | G                       | C           | exonic          | PTPN11 | E76Q              | 43.93% | nonsynonymous SNV      |                     | COSM13016                                              | Previously reported in haematopoietic samples in COSMIC database                                                          |
| 16         | chr1  | 115258747 | 115258747 | C                       | T           | exonic          | NRAS   | G12D              | 11.73% | nonsynonymous SNV      | rs121913237         | COSM564                                                | Previously reported in haematopoietic samples in COSMIC database, human variation database frequency less than 0.14%      |
| 17         | chr1  | 115256529 | 115256529 | T                       | C           | exonic          | NRAS   | Q61R              | 5%     | nonsynonymous SNV      | rs11554290          | COSM584                                                | Previously reported in haematopoietic samples in COSMIC database, human variation database frequency less than 0.14%      |
| 18         | chr15 | 90631934  | 90631934  | C                       | T           | exonic          | IDH2   | R140Q             | 45.28% | nonsynonymous SNV      | rs121913502         | COSM41590                                              | Previously reported in haematopoietic samples in COSMIC database, human variation database frequency less than 0.14%      |
| 18         | chr2  | 25457242  | 25457242  | C                       | T           | exonic          | DNMT3A | R882H             | 49.13% | nonsynonymous SNV      | rs147001633         | COSM52944,COSM442676                                   | Previously reported in haematopoietic samples in COSMIC database, human variation database frequency less than 0.14%      |
| 18         | chr13 | 28592642  | 28592642  | C                       | A           | exonic          | FLT3   | D835Y             | 45.06% | nonsynonymous SNV      | rs121913488         | COSM783                                                | Previously reported in haematopoietic samples in COSMIC database, human variation database frequency less than 0.14%      |

|    |       |           |           |        |      |          |        |            |        |                        |             |                                                                   |                                                                                                                      |
|----|-------|-----------|-----------|--------|------|----------|--------|------------|--------|------------------------|-------------|-------------------------------------------------------------------|----------------------------------------------------------------------------------------------------------------------|
| 19 | chr17 | 7578203   | 7578203   | C      | T    | exonic   | TP53   | V84M       | 5.34%  | nonsynonymous SNV      |             | COSM120097,COSM120095,COSM10667,COSM120096,COSM1644280,COSM120098 | Previously reported in haematopoietic samples in COSMIC database                                                     |
| 20 | chr1  | 115258744 | 115258744 | C      | T    | exonic   | NRAS   | G13D       | 28.51% | nonsynonymous SNV      | rs121434596 | COSM573                                                           | Previously reported in haematopoietic samples in COSMIC database, human variation database frequency less than 0.14% |
| 21 | chr2  | 25464463  | 25464463  | C      | A    | exonic   | DNMT3A | V684F      | 47.94% | nonsynonymous SNV      |             |                                                                   | Somatic mutation documented in haematopoietic sample in COSMIC within 1 codon COSM1690275 G685E                      |
| 22 | chr11 | 32413565  | 32413565  | C      | T    | exonic   | WT1    | R462Q      | 41.16% | nonsynonymous SNV      |             | COSM21434                                                         | Previously reported in haematopoietic samples in COSMIC database                                                     |
| 22 | chr1  | 115256530 | 115256530 | G      | T    | exonic   | NRAS   | Q61K       | 33.08% | nonsynonymous SNV      | rs121913254 | COSM580                                                           | Previously reported in haematopoietic samples in COSMIC database, human variation database frequency less than 0.14% |
| 22 | chr4  | 55593437  | 55593437  | G      | A    | exonic   | KIT    | V528I      | 44.71% | nonsynonymous SNV      | rs55792975  |                                                                   | Previously reported in human variation database frequency less than 0.14%                                            |
| 23 | chr4  | 106158253 | 106158253 | A      | -    | exonic   | TET2   | K1052fs    | 14.83% | frameshift deletion    |             |                                                                   | frameshift indel, nonsense or splicing variant                                                                       |
| 23 | chr4  | 106180785 | 106180785 | -      | G    | exonic   | TET2   | C1271W     | 38.37% | nonsynonymous SNV      |             | COSM120176                                                        | Previously reported in haematopoietic samples in COSMIC database                                                     |
| 23 | chr5  | 170837547 | 170837547 | -      | CCGG | exonic   | NPM1   | W288fs     | 37.65% | frameshift insertion   |             | COSM20806                                                         | Previously reported in haematopoietic samples in COSMIC database                                                     |
| 24 | chr4  | 55589771  | 55589776  | ACGACA | -    | exonic   | KIT    | 418_420del | 35.82% | nonframeshift deletion |             |                                                                   | frameshift indel, nonsense or splicing variant                                                                       |
| 24 | chr12 | 112888198 | 112888198 | G      | A    | exonic   | PTPN11 | A72T       | 6.21%  | nonsynonymous SNV      |             | COSM13014                                                         | Previously reported in haematopoietic samples in COSMIC database                                                     |
| 26 | chr21 | 36252866  | 36252866  | G      | A    | exonic   | RUNX1  | R166X      | 84.85% | stopgain               |             | COSM24769                                                         | Previously reported in haematopoietic samples in COSMIC database                                                     |
| 28 | chr10 | 110584233 | 110584233 | G      | A    | exonic   | SMC3   | R381Q      | 50.53% | nonsynonymous SNV      |             | COSM1317491                                                       | Previously reported in haematopoietic samples in COSMIC database                                                     |
| 29 | chr10 | 112343991 | 112343991 | G      | A    | exonic   | SMC3   | R381Q      | 50.53% | nonsynonymous SNV      |             | COSM1317491                                                       | Previously reported in haematopoietic samples in COSMIC database                                                     |
| 29 | chr5  | 170837547 | 170837547 | -      | TCTG | exonic   | NPM1   | W288fs     | 29.90% | frameshift insertion   |             | COSM17559                                                         | Previously reported in haematopoietic samples in COSMIC database                                                     |
| 30 | chr21 | 36164830  | 36164830  | A      | -    | exonic   | RUNX1  | Y349fs     | 25.46% | frameshift deletion    |             |                                                                   | frameshift indel, nonsense or splicing variant                                                                       |
| 30 | chr4  | 106196770 | 106196770 | G      | A    | exonic   | TET2   | M1701I     | 20.45% | nonsynonymous SNV      | rs62623390  |                                                                   | Previously reported in human variation database frequency less than 0.14%                                            |
| 31 | chr5  | 170837547 | 170837547 | -      | CCAG | exonic   | NPM1   | W288fs     | 46.44% | frameshift insertion   |             | COSM20809                                                         | Previously reported in haematopoietic samples in COSMIC database                                                     |
| 32 | chrX  | 44514777  | 44514777  | T      | C    | exonic   | U2AF1  | Q84R       | 40.02% | nonsynonymous SNV      |             | COSM211532,COSM1724986                                            | Previously reported in haematopoietic samples in COSMIC database                                                     |
| 32 | chr2  | 209113113 | 209113113 | G      | A    | exonic   | IDH1   | R132C      | 18.69% | nonsynonymous SNV      | rs121913499 | COSM28747                                                         | Previously reported in haematopoietic samples in COSMIC database, human variation database frequency less than 0.14% |
| 33 | chr11 | 32417908  | 32417908  | C      | -    | exonic   | WT1    | S381fs     | 30.89% | frameshift deletion    |             |                                                                   | Frameshift indel detected in Papaemanuil NEJM 2016 in same codon                                                     |
| 33 | chr4  | 106157638 | 106157638 | C      | T    | exonic   | TET2   | Q847X      | 45.35% | stopgain               |             |                                                                   | frameshift indel, nonsense or splicing variant                                                                       |
| 33 | chr5  | 170837547 | 170837547 | -      | TCAG | exonic   | NPM1   | W288fs     | 42.53% | frameshift insertion   |             | COSM20856                                                         | Previously reported in haematopoietic samples in COSMIC database                                                     |
| 33 | chr11 | 32417914  | 32417914  | G      | C    | exonic   | WT1    | R380G      | 5.16%  | nonsynonymous SNV      |             | COSM28984                                                         | Previously reported in haematopoietic samples in COSMIC database                                                     |
| 34 | chr21 | 36252936  | 36252936  | -      | GC   | exonic   | RUNX1  | A142fs     | 11.02% | frameshift insertion   |             |                                                                   | frameshift indel, nonsense or splicing variant                                                                       |
| 34 | chr20 | 31022592  | 31022592  | C      | T    | exonic   | ASXL1  | R693X      | 42.72% | stopgain               |             | COSM51388                                                         | Previously reported in haematopoietic samples in COSMIC database                                                     |
| 35 | chr17 | 74732959  | 74732959  | G      | C    | exonic   | SRSF2  | P95R       | 25.95% | nonsynonymous SNV      |             | COSM211661                                                        | Previously reported in haematopoietic samples in COSMIC database                                                     |
| 35 | chr15 | 90631934  | 90631934  | C      | T    | exonic   | IDH2   | R140Q      | 46.40% | nonsynonymous SNV      | rs121913502 | COSM41590                                                         | Previously reported in haematopoietic samples in COSMIC database, human variation database frequency less than 0.14% |
| 36 | chr5  | 170837547 | 170837547 | -      | TCTG | exonic   | NPM1   | W288fs     | 38.71% | frameshift insertion   |             | COSM17559                                                         | Previously reported in haematopoietic samples in COSMIC database                                                     |
| 36 | chr13 | 28592642  | 28592642  | C      | A    | exonic   | FLT3   | D835Y      | 49.38% | nonsynonymous SNV      | rs121913488 | COSM783                                                           | Previously reported in haematopoietic samples in COSMIC database, human variation database frequency less than 0.14% |
| 37 | chr4  | 106156959 | 106156959 | C      | -    | exonic   | TET2   | Y620X      | 23.36% | stopgain               |             |                                                                   | frameshift indel, nonsense or splicing variant                                                                       |
| 37 | chr17 | 74732959  | 74732959  | G      | A    | exonic   | SRSF2  | P95L       | 61.63% | nonsynonymous SNV      |             | COSM146288,COSM211506,COSM211028                                  | Previously reported in haematopoietic samples in COSMIC database                                                     |
| 37 | chr21 | 36164838  | 36164838  | -      | G    | exonic   | RUNX1  | R346fs     | 20.35% | frameshift insertion   |             | COSM36063                                                         | Previously reported in haematopoietic samples in COSMIC database                                                     |
| 37 | chr2  | 209113113 | 209113113 | G      | A    | exonic   | IDH1   | R132C      | 40.99% | nonsynonymous SNV      | rs121913499 | COSM28747                                                         | Previously reported in haematopoietic samples in COSMIC database, human variation database frequency less than 0.14% |
| 38 | chr5  | 170837547 | 170837547 | -      | TCTG | exonic   | NPM1   | W288fs     | 42.76% | frameshift insertion   |             | COSM17559                                                         | Previously reported in haematopoietic samples in COSMIC database                                                     |
| 38 | chr4  | 106158237 | 106158237 | -      | A    | exonic   | TET2   | T1047fs    | 25.00% | frameshift insertion   |             | COSM211700                                                        | Previously reported in haematopoietic samples in COSMIC database                                                     |
| 38 | chr13 | 28608281  | 28608281  | A      | C    | exonic   | FLT3   | V592G      | 15.41% | nonsynonymous SNV      |             | COSM28045                                                         | Previously reported in haematopoietic samples in COSMIC database                                                     |
| 38 | chr13 | 28592642  | 28592642  | C      | A    | exonic   | FLT3   | D835Y      | 18.17% | nonsynonymous SNV      | rs121913488 | COSM783                                                           | Previously reported in haematopoietic samples in COSMIC database, human variation database frequency less than 0.14% |
| 38 | chr12 | 12037440  | 12037440  | C      | A    | exonic   | ETV6   | F357L      | 38.06% | nonsynonymous SNV      |             |                                                                   | Somatic mutation documented in haematopoietic sample in COSMIC within 2 codons COSM5683034 F359Q                     |
| 39 | chr5  | 170837547 | 170837547 | -      | TCTG | exonic   | NPM1   | W288fs     | 34.04% | frameshift insertion   |             | COSM17559                                                         | Previously reported in haematopoietic samples in COSMIC database                                                     |
| 39 | chr15 | 90631934  | 90631934  | C      | T    | exonic   | IDH2   | R140Q      | 45.97% | nonsynonymous SNV      | rs121913502 | COSM41590                                                         | Previously reported in haematopoietic samples in COSMIC database, human variation database frequency less than 0.14% |
| 40 | chr2  | 209113113 | 209113113 | G      | T    | exonic   | IDH1   | R132S      | 43.98% | nonsynonymous SNV      | rs121913499 | COSM28748                                                         | Previously reported in haematopoietic samples in COSMIC database, human variation database frequency less than 0.14% |
| 41 | chr2  | 25462024  | 25462024  | A      | G    | exonic   | DNMT3A | W795R      | 46.15% | nonsynonymous SNV      |             |                                                                   | ND, but variant 2bp downstream in same aa: W795C=ONCOGENIC                                                           |
| 41 | chr5  | 170837547 | 170837547 | -      | CCTG | exonic   | NPM1   | W288fs     | 43.73% | frameshift insertion   |             | COSM17573                                                         | Previously reported in haematopoietic samples in COSMIC database                                                     |
| 41 | chr20 | 31023821  | 31023821  | G      | T    | exonic   | ASXL1  | E1102D     | 50.98% | nonsynonymous SNV      | rs139115934 | COSM36205                                                         | Previously reported in haematopoietic samples in COSMIC database, human variation database frequency less than 0.14% |
| 41 | chr15 | 90631934  | 90631934  | C      | T    | exonic   | IDH2   | R140Q      | 51.89% | nonsynonymous SNV      | rs121913502 | COSM41590                                                         | Previously reported in haematopoietic samples in COSMIC database, human variation database frequency less than 0.14% |
| 42 | chr5  | 149441413 | 149441413 | C      | T    | splicing | CSF1R  |            | 84.05% | Splicing               |             |                                                                   | frameshift indel, nonsense or splicing variant                                                                       |
| 42 | chr21 | 36164601  | 36164601  | G      | A    | exonic   | RUNX1  | P425L      | 26.05% | nonsynonymous SNV      |             | COSM87293                                                         | Previously reported in haematopoietic samples in COSMIC database                                                     |
| 42 | chr17 | 7577539   | 7577539   | G      | A    | exonic   | TP53   | R116W      | 9.48%  | nonsynonymous SNV      | rs121912651 | COSM120006,COSM120005,COSM1640831,COSM10656,COSM120007            | Previously reported in haematopoietic samples in COSMIC database, human variation database frequency less than 0.14% |
| 42 | chr9  | 72965035  | 72965035  | T      | G    | exonic   | SMC5   | D965E      | 38.78% | nonsynonymous SNV      |             |                                                                   | Somatic mutation documented in haematopoietic sample in COSMIC within 2 codons COSM3716331 D967H                     |
| 43 | chr5  | 170837547 | 170837547 | -      | TCTG | exonic   | NPM1   | W288fs     | 33.05% | frameshift insertion   |             | COSM17559                                                         | Previously reported in haematopoietic samples in COSMIC database                                                     |
| 43 | chr2  | 25457242  | 25457242  | C      | T    | exonic   | DNMT3A | R882H      | 40.62% | nonsynonymous SNV      | rs147001633 | COSM52944,COSM442676                                              | Previously reported in haematopoietic samples in COSMIC database, human variation database frequency less than 0.14% |
| 45 | chr11 | 32417915  | 32417915  | -      | ACAA | exonic   | WT1    | L378fs     | 12.43% | frameshift insertion   |             |                                                                   | frameshift indel, nonsense or splicing variant                                                                       |
| 45 | chr5  | 170837547 | 170837547 | -      | TCTG | exonic   | NPM1   | W288fs     | 31.94% | frameshift insertion   |             | COSM17559                                                         | Previously reported in haematopoietic samples in COSMIC database                                                     |

|    |       |           |           |                 |             |        |        |                    |        |                         |             |                                  |                                                                                                                       |
|----|-------|-----------|-----------|-----------------|-------------|--------|--------|--------------------|--------|-------------------------|-------------|----------------------------------|-----------------------------------------------------------------------------------------------------------------------|
| 45 | chr2  | 25457243  | 25457243  | G               | A           | exonic | DNMT3A | R882C              | 40.96% | nonsynonymous SNV       |             | COSM53042,COSM1166704            | Previously reported in haematopoietic samples in COSMIC database                                                      |
| 46 | chr11 | 32413539  | 32413548  | TGTTGGGGT       | -           | exonic | WT1    | T468fs             | 64.68% | frameshift deletion     |             |                                  | frameshift indel, nonsense or splicing variant                                                                        |
| 46 | chr4  | 55593437  | 55593437  | G               | A           | exonic | KIT    | V528I              | 34.96% | nonsynonymous SNV       | rs55792975  |                                  | Previously reported in human variation database frequency less than 0.14%                                             |
| 47 | chr4  | 55589773  | 55589775  | GAC             | -           | exonic | KIT    | 419_419del         | 46.11% | nonframeshift deletion  |             | COSM29014                        | Previously reported in haematopoietic samples in COSMIC database                                                      |
| 47 | chr4  | 106196819 | 106196819 | G               | T           | exonic | TET2   | V1718L             | 54.53% | nonsynonymous SNV       | rs142312318 | COSM41742                        | Previously reported in haematopoietic samples in COSMIC database, human variation database frequency less than 0.14%  |
| 49 | chr22 | 36259163  | 36259163  | T               | G           | exonic | RUNX1  | K110Q              | 42.07% | nonsynonymous SNV       |             | COSM26691                        | Previously reported in haematopoietic samples in COSMIC database                                                      |
| 49 | chr4  | 106157374 | 106157374 | A               | C           | exonic | TET2   | T759P              | 47.09% | nonsynonymous SNV       |             |                                  | Somatic mutation documented in haematopoietic sample in COSMIC within 1 codon COSM4383839 Q758X                       |
| 50 | chr4  | 106164914 | 106164914 | G               | A           | exonic | TET2   | R1261H             | 5.66%  | nonsynonymous SNV       |             | COSM211643                       | Previously reported in haematopoietic samples in COSMIC database                                                      |
| 50 | chr1  | 115256529 | 115256529 | T               | C           | exonic | NRAS   | Q61R               | 25.54% | nonsynonymous SNV       | rs11554290  | COSM584                          | Previously reported in haematopoietic samples in COSMIC database, human variation database frequency less than 0.14%  |
| 52 | chr12 | 112926884 | 112926884 | T               | C           | exonic | PTPN11 | S502P              | 14.46% | nonsynonymous SNV       |             | COSM13020                        | Previously reported in haematopoietic samples in COSMIC database                                                      |
| 52 | chr5  | 170837547 | 170837547 | -               | CATG        | exonic | NPM1   | W288fs             | 42.57% | frameshift insertion    |             | COSM17571                        | Previously reported in haematopoietic samples in COSMIC database                                                      |
| 52 | chr2  | 209113112 | 209113112 | C               | T           | exonic | IDH1   | R132H              | 44.18% | nonsynonymous SNV       | rs121913500 | COSM28746                        | Previously reported in haematopoietic samples in COSMIC database, human variation database frequency less than 0.14%  |
| 52 | chr1  | 115258747 | 115258747 | C               | T           | exonic | NRAS   | G12D               | 23.02% | nonsynonymous SNV       | rs121913237 | COSM564                          | Previously reported in haematopoietic samples in COSMIC database, human variation database frequency less than 0.14%  |
| 53 | chr2  | 25457242  | 25457242  | C               | T           | exonic | DNMT3A | R882H              | 21.83% | nonsynonymous SNV       | rs147001633 | COSM52944,COSM442676             | Previously reported in haematopoietic samples in COSMIC database, human variation database frequency less than 0.14%  |
| 56 | chr5  | 170837547 | 170837547 | -               | TCTG        | exonic | NPM1   | W288fs             | 33.33% | frameshift insertion    |             | COSM17559                        | Previously reported in haematopoietic samples in COSMIC database                                                      |
| 56 | chr2  | 25457242  | 25457242  | C               | T           | exonic | DNMT3A | R882H              | 41.89% | nonsynonymous SNV       | rs147001633 | COSM52944,COSM442676             | Previously reported in haematopoietic samples in COSMIC database, human variation database frequency less than 0.14%  |
| 57 | chr1  | 115258747 | 115258747 | C               | T           | exonic | NRAS   | G12D               | 61.98% | nonsynonymous SNV       | rs121913237 | COSM564                          | Previously reported in haematopoietic samples in COSMIC database, human variation database frequency less than 0.14%  |
| 58 | chr12 | 25398285  | 25398285  | C               | A           | exonic | KRAS   | G12C               | 30.91% | nonsynonymous SNV       | rs121913530 | COSM1140136,COSM516              | Previously reported in haematopoietic samples in COSMIC database, human variation database frequency less than 0.14%  |
| 58 | chrX  | 15821902  | 15821902  | C               | T           | exonic | ZRSR2  | R99W               | 63.29% | nonsynonymous SNV       | rs181618355 |                                  | Previously reported in human variation database frequency less than 0.14%                                             |
| 60 | chr2  | 25459806  | 25459806  | T               | C           | exonic | DNMT3A | K826R              | 43.60% | nonsynonymous SNV       |             | COSM1583124                      | Previously reported in haematopoietic samples in COSMIC database                                                      |
| 61 | chr5  | 170837547 | 170837547 | -               | TCTG        | exonic | NPM1   | W288fs             | 39.34% | frameshift insertion    |             | COSM17559                        | Previously reported in haematopoietic samples in COSMIC database                                                      |
| 61 | chr11 | 32413565  | 32413565  | C               | T           | exonic | WT1    | R462Q              | 42.26% | nonsynonymous SNV       |             | COSM21434                        | Previously reported in haematopoietic samples in COSMIC database                                                      |
| 62 | chr21 | 36252938  | 36252938  | -               | CGGCCTGAGCG | exonic | RUNX1  | S330delinsTS       | 41.06% | frameshift insertion    |             |                                  | Frameshift indel detected in Papaemmanuil NEJM 2016 in same codon                                                     |
| 62 | chrX  | 133559250 | 133559250 | -               | CAA         | exonic | PHF6   | H329_S330delinsPTX | 26.45% | nonframeshift insertion |             |                                  | frameshift indel, nonsense or splicing variant                                                                        |
| 62 | chr21 | 36252940  | 36252940  | -               | GCCTGAGCGCG | exonic | RUNX1  | S141fs             | 40.86% | frameshift insertion    |             |                                  | frameshift indel, nonsense or splicing variant                                                                        |
| 62 | chr17 | 7578394   | 7578394   | T               | G           | exonic | TP53   | H47P               | 85.78% | nonsynonymous SNV       |             | COSM44218                        | Previously reported in haematopoietic samples in COSMIC database                                                      |
| 62 | chr20 | 31023821  | 31023821  | G               | T           | exonic | ASXL1  | E1102D             | 50.69% | nonsynonymous SNV       | rs139115934 | COSM36205                        | Previously reported in haematopoietic samples in COSMIC database, human variation database frequency less than 0.14%  |
| 64 | chr2  | 198266834 | 198266834 | T               | C           | exonic | SF3B1  | K700E              | 11.45% | nonsynonymous SNV       |             | COSM84677                        | Previously reported in haematopoietic samples in COSMIC database                                                      |
| 65 | chr21 | 36231791  | 36231791  | T               | C           | exonic | RUNX1  | D198G              | 55.84% | nonsynonymous SNV       |             | COSM24799                        | Previously reported in haematopoietic samples in COSMIC database                                                      |
| 65 | chr17 | 74732960  | 74732960  | G               | C           | exonic | SRSF2  | P95A               | 47.58% | nonsynonymous SNV       |             | COSM307352                       | Previously reported in haematopoietic samples in COSMIC database                                                      |
| 65 | chr21 | 36231860  | 36231860  | A               | G           | exonic | RUNX1  | L175P              | 7.48%  | nonsynonymous SNV       |             | COSM96548                        | Previously reported in haematopoietic samples in COSMIC database                                                      |
| 65 | chr4  | 106196819 | 106196819 | G               | T           | exonic | TET2   | V1718L             | 51.79% | nonsynonymous SNV       | rs142312318 | COSM41742                        | Previously reported in haematopoietic samples in COSMIC database, human variation database frequency less than 0.14%  |
| 66 | chr1  | 115258748 | 115258748 | C               | T           | exonic | NRAS   | G12S               | 48.80% | nonsynonymous SNV       | rs121913250 | COSM563                          | Previously reported in haematopoietic samples in COSMIC database, human variation database frequency less than 0.14%  |
| 67 | chr21 | 36252865  | 36252865  | C               | T           | exonic | RUNX1  | R166Q              | 16.87% | nonsynonymous SNV       |             | COSM36055                        | Previously reported in haematopoietic samples in COSMIC database                                                      |
| 67 | chr2  | 209113113 | 209113113 | G               | A           | exonic | IDH1   | R132C              | 38.10% | nonsynonymous SNV       | rs121913499 | COSM28747                        | Previously reported in haematopoietic samples in COSMIC database, human variation database frequency less than 0.14%  |
| 67 | chrX  | 133551305 | 133551305 | T               | C           | exonic | PHF6   | I314T              | 62.92% | nonsynonymous SNV       |             |                                  | Previously reported in Papaemmanuil NEJM 2016                                                                         |
| 68 | chr5  | 170837547 | 170837547 | -               | TCTG        | exonic | NPM1   | W288fs             | 35.71% | frameshift insertion    |             | COSM17559                        | Previously reported in haematopoietic samples in COSMIC database                                                      |
| 69 | chr4  | 106190802 | 106190816 | GGGTCTGAAGGAAGG | -           | exonic | TET2   | 1360_1365del       | 58.05% | nonframeshift deletion  |             |                                  | frameshift indel, nonsense or splicing variant                                                                        |
| 69 | chrX  | 36259253  | 36259253  | C               | A           | exonic | RUNX1  | E80X               | 29.67% | stopgain                |             |                                  | frameshift indel, nonsense or splicing variant                                                                        |
| 69 | chr17 | 74732959  | 74732959  | G               | T           | exonic | SRSF2  | P95H               | 41.73% | nonsynonymous SNV       |             | COSM211505,COSM211029,COSM211504 | Previously reported in haematopoietic samples in COSMIC database                                                      |
| 69 | chrX  | 133549137 | 133549137 | G               | A           | exonic | PHF6   | R274Q              | 40.80% | nonsynonymous SNV       |             | COSM306061                       | Previously reported in haematopoietic samples in COSMIC database                                                      |
| 70 | chr20 | 31022245  | 31022245  | C               | G           | exonic | ASXL1  | S577X              | 43.89% | stopgain                |             |                                  | frameshift indel, nonsense or splicing variant                                                                        |
| 70 | chr11 | 119148991 | 119148991 | G               | A           | exonic | CBL    | C404Y              | 95.06% | nonsynonymous SNV       | rs192712314 | COSM34068                        | Previously reported in haematopoietic samples in COSMIC database, human variation database frequency less than 0.14%  |
| 70 | chr4  | 106180897 | 106180897 | T               | C           | exonic | TET2   | F1309L             | 96.79% | nonsynonymous SNV       |             |                                  | Somatic mutation documented in haematopoietic sample in COSMIC within 1 codon COSM4383839 K1310T                      |
| 71 | chr13 | 12038956  | 12038956  | T               | C           | exonic | ETV6   | F417L              | 68.01% | nonsynonymous SNV       |             |                                  | Different SNV in same codon in haematopoietic sample in COSMIC confirmed somatic COSM5879372 F417C                    |
| 71 | chr17 | 7578548   | 7578548   | G               | T           | exonic | TP53   | P89T               | 43.33% | nonsynonymous SNV       |             |                                  | Mutations in TP53 are widely distributed across the gene. FATHMM algorithm predicts a strong association with cancer. |
| 72 | chr4  | 55599321  | 55599321  | A               | T           | exonic | KIT    | D812V              | 31.69% | nonsynonymous SNV       | rs121913507 | COSM1314                         | Previously reported in haematopoietic samples in COSMIC database, human variation database frequency less than 0.14%  |
| 73 | chr4  | 106196834 | 106196834 | C               | T           | exonic | TET2   | P1723S             | 48.74% | nonsynonymous SNV       |             | COSM1235472                      | Previously reported in haematopoietic samples in COSMIC database                                                      |
| 73 | chr4  | 106157698 | 106157698 | T               | C           | exonic | TET2   | Y867H              | 48.75% | nonsynonymous SNV       | rs146348065 | COSM1235472                      | Previously reported in haematopoietic samples in COSMIC database, human variation database frequency less than 0.14%  |
| 74 | chr4  | 106157710 | 106157710 | A               | T           | exonic | TET2   | N871Y              | 48.56% | nonsynonymous SNV       |             |                                  | Somatic mutation documented in haematopoietic sample in COSMIC within 3 codons COSM220395 P874A                       |
| 75 | chr17 | 74732959  | 74732959  | G               | C           | exonic | SRSF2  | P95R               | 7.17%  | nonsynonymous SNV       |             | COSM211661                       | Previously reported in haematopoietic samples in COSMIC database                                                      |

|     |       |           |           |             |      |          |        |          |        |                      |             |                                  |                                                                                                                      |
|-----|-------|-----------|-----------|-------------|------|----------|--------|----------|--------|----------------------|-------------|----------------------------------|----------------------------------------------------------------------------------------------------------------------|
| 75  | chr17 | 90631934  | 90631934  | C           | T    | exonic   | IDH2   | R140Q    | 46.87% | nonsynonymous SNV    | rs121913502 | COSM41590                        | Previously reported in haematopoietic samples in COSMIC database, human variation database frequency less than 0.14% |
| 76  | chr5  | 170837547 | 170837547 | -           | TCTG | exonic   | NPM1   | W288fs   | 29.14% | frameshift insertion |             | COSM17559                        | Previously reported in haematopoietic samples in COSMIC database                                                     |
| 76  | chr20 | 31023821  | 31023821  | G           | T    | exonic   | ASXL1  | E1102D   | 45.47% | nonsynonymous SNV    | rs139115934 | COSM36205                        | Previously reported in haematopoietic samples in COSMIC database, human variation database frequency less than 0.14% |
| 76  | chr2  | 25457242  | 25457242  | C           | T    | exonic   | DNMT3A | R882H    | 38.33% | nonsynonymous SNV    | rs147001633 | COSM52944,COSM442676             | Previously reported in haematopoietic samples in COSMIC database, human variation database frequency less than 0.14% |
| 76  | chr1  | 115258747 | 115258747 | C           | T    | exonic   | NRAS   | G12D     | 27.57% | nonsynonymous SNV    | rs121913237 | COSM564                          | Previously reported in haematopoietic samples in COSMIC database, human variation database frequency less than 0.14% |
| 77  | chr5  | 170837547 | 170837547 | -           | TCTG | exonic   | NPM1   | W288fs   | 43.08% | frameshift insertion |             | COSM17559                        | Previously reported in haematopoietic samples in COSMIC database                                                     |
| 77  | chr2  | 209113113 | 209113113 | G           | C    | exonic   | IDH1   | R132G    | 46.02% | nonsynonymous SNV    |             | COSM28749                        | Previously reported in haematopoietic samples in COSMIC database                                                     |
| 79  | chr12 | 25398284  | 25398284  | C           | T    | exonic   | KRAS   | G12D     | 40.43% | nonsynonymous SNV    | rs121913529 | COSM1135366,COSM521              | Previously reported in haematopoietic samples in COSMIC database, human variation database frequency less than 0.14% |
| 79  | chr4  | 55599321  | 55599321  | A           | T    | exonic   | KIT    | D812V    | 8.38%  | nonsynonymous SNV    | rs121913507 | COSM1314                         | Previously reported in haematopoietic samples in COSMIC database, human variation database frequency less than 0.14% |
| 80  | chr4  | 106196819 | 106196819 | G           | T    | exonic   | TET2   | V1718L   | 46.92% | nonsynonymous SNV    | rs142312318 | COSM41742                        | Previously reported in haematopoietic samples in COSMIC database, human variation database frequency less than 0.14% |
| 81  | chrX  | 133559234 | 133559234 | -           | CC   | exonic   | PHF6   | L324fs   | 88%    | frameshift insertion |             |                                  | frameshift indel, nonsense or splicing variant                                                                       |
| 81  | chr17 | 74732959  | 74732959  | G           | A    | exonic   | SRSF2  | P95L     | 72.37% | nonsynonymous SNV    |             | COSM146288,COSM211506,COSM211028 | Previously reported in haematopoietic samples in COSMIC database                                                     |
| 81  | chr4  | 106156384 | 106156384 | G           | A    | exonic   | TET2   | G429R    | 52.08% | nonsynonymous SNV    |             | COSM219042                       | Previously reported in haematopoietic samples in COSMIC database                                                     |
| 82  | chr4  | 106196819 | 106196819 | G           | T    | exonic   | TET2   | V1718L   | 45.61% | nonsynonymous SNV    | rs142312318 | COSM41742                        | Previously reported in haematopoietic samples in COSMIC database, human variation database frequency less than 0.14% |
| 83  | chr2  | 25459807  | 25459807  | T           | C    | exonic   | DNMT3A | K826E    | 8.79%  | nonsynonymous SNV    |             |                                  | Different SNV in same codon in haematopoietic sample in COSMIC confirmed somatic COSM5708156 K826N                   |
| 83  | chr15 | 90631838  | 90631838  | C           | T    | exonic   | IDH2   | R172K    | 14.93% | nonsynonymous SNV    | rs121913503 | COSM33733                        | Previously reported in haematopoietic samples in COSMIC database, human variation database frequency less than 0.14% |
| 84  | chr17 | 74732959  | 74732959  | G           | T    | exonic   | SRSF2  | P95H     | 55.32% | nonsynonymous SNV    |             | COSM211505,COSM211029,COSM211504 | Previously reported in haematopoietic samples in COSMIC database                                                     |
| 84  | chr21 | 36252940  | 36252940  | G           | A    | exonic   | RUNX1  | S141L    | 15.28% | nonsynonymous SNV    |             | COSM24737                        | Previously reported in haematopoietic samples in COSMIC database                                                     |
| 85  | chr11 | 32413557  | 32413557  | G           | A    | exonic   | WT1    | H465Y    | 14.30% | nonsynonymous SNV    |             | COSM1317334,COSM1317335          | Previously reported in haematopoietic samples in COSMIC database                                                     |
| 86  | chr4  | 106156915 | 106156925 | ACTGGAAATTC | -    | exonic   | TET2   | T606fs   | 53.60% | frameshift deletion  |             |                                  | Frameshift indel detected in Papaemmanuil NEJM 2016 in same codon                                                    |
| 86  | chr17 | 7577093   | 7577093   | C           | T    | exonic   | TP53   | R282Q    | 45.38% | nonsynonymous SNV    |             | COSM99936,COSM44338,COSM1646815  | Previously reported in haematopoietic samples in COSMIC database                                                     |
| 87  | chr5  | 170837547 | 170837547 | -           | TCTG | exonic   | NPM1   | W288fs   | 37.30% | frameshift insertion |             | COSM17559                        | Previously reported in haematopoietic samples in COSMIC database                                                     |
| 88  | chr17 | 74732959  | 74732959  | G           | T    | exonic   | SRSF2  | P95H     | 12.27% | nonsynonymous SNV    |             | COSM211505,COSM211029,COSM211504 | Previously reported in haematopoietic samples in COSMIC database                                                     |
| 88  | chrX  | 36259172  | 36259172  | G           | A    | exonic   | RUNX1  | R107C    | 6.46%  | nonsynonymous SNV    |             | COSM24736                        | Previously reported in haematopoietic samples in COSMIC database                                                     |
| 89  | chr4  | 55561860  | 55561860  | A           | C    | exonic   | KIT    | T84P     | 43.55% | nonsynonymous SNV    |             |                                  | Different SNV in same codon in haematopoietic sample in COSMIC confirmed somatic COSM3380948 T84M                    |
| 89  | chr4  | 55599321  | 55599321  | A           | T    | exonic   | KIT    | D812V    | 37.58% | nonsynonymous SNV    | rs121913507 | COSM1314                         | Previously reported in haematopoietic samples in COSMIC database, human variation database frequency less than 0.14% |
| 89  | chr4  | 106196819 | 106196819 | G           | T    | exonic   | TET2   | V1718L   | 48.44% | nonsynonymous SNV    | rs142312318 | COSM41742                        | Previously reported in haematopoietic samples in COSMIC database, human variation database frequency less than 0.14% |
| 90  | chr2  | 25458602  | 25458602  | G           | -    | exonic   | DNMT3A | D857fs   | 20.92% | frameshift deletion  |             | COSM1683137,COSM1683138          | Previously reported in haematopoietic samples in COSMIC database                                                     |
| 90  | chr15 | 90631838  | 90631838  | C           | T    | exonic   | IDH2   | R172K    | 32.11% | nonsynonymous SNV    | rs121913503 | COSM33733                        | Previously reported in haematopoietic samples in COSMIC database, human variation database frequency less than 0.14% |
| 91  | chr5  | 170837547 | 170837547 | -           | TCTG | exonic   | NPM1   | W288fs   | 24.66% | frameshift insertion |             | COSM17559                        | Previously reported in haematopoietic samples in COSMIC database                                                     |
| 91  | chr2  | 25463541  | 25463541  | G           | C    | exonic   | DNMT3A | S714C    | 47.92% | nonsynonymous SNV    |             | COSM442677,COSM87011             | Previously reported in haematopoietic samples in COSMIC database                                                     |
| 91  | chrX  | 39932564  | 39932564  | G           | T    | exonic   | BCOR   | V679I    | 99.73% | nonsynonymous SNV    | rs144722432 |                                  | Previously reported in human variation database frequency less than 0.14%                                            |
| 92  | chr4  | 106157945 | 106157945 | A           | G    | exonic   | TET2   | H949R    | 45.92% | nonsynonymous SNV    |             |                                  | Previously reported in Papaemmanuil NEJM 2016                                                                        |
| 92  | chr2  | 209113113 | 209113113 | G           | A    | exonic   | IDH1   | R132C    | 41.34% | nonsynonymous SNV    | rs121913499 | COSM28747                        | Previously reported in haematopoietic samples in COSMIC database, human variation database frequency less than 0.14% |
| 92  | chr5  | 149436930 | 149436930 | G           | T    | exonic   | CSF1R  | G747R    | 46.85% | nonsynonymous SNV    | rs41355444  |                                  | Previously reported in human variation database frequency less than 0.14%                                            |
| 92  | chr17 | 74732959  | 74732959  | C           | A    | exonic   | SRSF2  | P95L     | 71.82% | nonsynonymous SNV    |             | COSM146288,COSM211506,COSM211028 | Previously reported in haematopoietic samples in COSMIC database                                                     |
| 93  | chr2  | 25457281  | 25457281  | C           | -    | exonic   | DNMT3A | G869fs   | 14.10% | frameshift deletion  |             | COSM133716                       | Previously reported in haematopoietic samples in COSMIC database                                                     |
| 93  | chr5  | 170837547 | 170837547 | -           | TCTG | exonic   | NPM1   | W288fs   | 31.08% | frameshift insertion |             | COSM17559                        | Previously reported in haematopoietic samples in COSMIC database                                                     |
| 93  | chr11 | 32417907  | 32417907  | -           | CCGA | exonic   | WT1    | R380fs   | 12.71% | frameshift insertion |             | COSM17559                        | Previously reported in haematopoietic samples in COSMIC database                                                     |
| 95  | G     | 170837547 | 170837547 | -           | TCTG | exonic   | NPM1   | W288fs   | 40.90% | frameshift insertion |             | COSM17559                        | Previously reported in haematopoietic samples in COSMIC database                                                     |
| 95  | C     | 25457242  | 25457242  | C           | T    | exonic   | DNMT3A | R882H    | 48.95% | nonsynonymous SNV    | rs147001633 | COSM52944,COSM442676             | Previously reported in haematopoietic samples in COSMIC database, human variation database frequency less than 0.14% |
| 96  | C     | 25398284  | 25398284  | C           | A    | exonic   | KRAS   | G12V     | 25.97% | nonsynonymous SNV    |             | COSM1140133,COSM520              | Previously reported in haematopoietic samples in COSMIC database                                                     |
| 97  | chr21 | 36231773  | 36231773  | C           | T    | exonic   | RUNX1  | R204Q    | 25.12% | nonsynonymous SNV    |             | COSM24731                        | Previously reported in haematopoietic samples in COSMIC database                                                     |
| 98  | chr13 | 28602329  | 28602329  | G           | A    | exonic   | FLT3   | A680V    | 44.69% | nonsynonymous SNV    |             | COSM786                          | Previously reported in haematopoietic samples in COSMIC database                                                     |
| 98  | chr9  | 5073770   | 5073770   | G           | T    | exonic   | JAK2   | V617F    | 44.24% | nonsynonymous SNV    | rs77375493  | COSM12600                        | Previously reported in haematopoietic samples in COSMIC database, human variation database frequency less than 0.14% |
| 99  | chr2  | 25463286  | 25463286  | C           | T    | exonic   | DNMT3A | R736H    | 90.37% | nonsynonymous SNV    | rs139293773 | COSM133737,COSM1318940           | Previously reported in haematopoietic samples in COSMIC database, human variation database frequency less than 0.14% |
| 99  | chr17 | 90631838  | 90631838  | C           | T    | exonic   | IDH2   | R172K    | 47.39% | nonsynonymous SNV    | rs121913503 | COSM33733                        | Previously reported in haematopoietic samples in COSMIC database, human variation database frequency less than 0.14% |
| 100 | chr13 | 28623585  | 28623585  | G           | T    | exonic   | FLT3   | D324E    | 49.35% | nonsynonymous SNV    |             |                                  | Different SNV in same codon in haematopoietic sample in COSMIC confirmed somatic COSM46508 D324N                     |
| 100 | chr4  | 106164914 | 106164914 | G           | A    | exonic   | TET2   | R1261H   | 45.21% | nonsynonymous SNV    |             | COSM211643                       | Previously reported in haematopoietic samples in COSMIC database                                                     |
| 100 | chr21 | 36253011  | 36253011  | C           | T    | splicing | RUNX1  | splicing | 25.61% | Splicing             |             | COSM26032                        | Previously reported in haematopoietic samples in COSMIC database                                                     |
| 100 | chr4  | 106156747 | 106156747 | C           | T    | exonic   | TET2   | R550X    | 39.72% | stopgain             |             | COSM26032                        | Previously reported in haematopoietic samples in COSMIC database                                                     |

|     |       |           |           |        |      |        |        |         |        |                      |             |                      |                                                                                                                      |
|-----|-------|-----------|-----------|--------|------|--------|--------|---------|--------|----------------------|-------------|----------------------|----------------------------------------------------------------------------------------------------------------------|
| 100 | chr9  | 5073770   | 5073770   | G      | T    | exonic | JAK2   | V617F   | 13.82% | nonsynonymous SNV    | rs77375493  | COSM12600            | Previously reported in haematopoietic samples in COSMIC database, human variation database frequency less than 0.14% |
| 100 | chr15 | 90631934  | 90631934  | C      | T    | exonic | IDH2   | R140Q   | 19.22% | nonsynonymous SNV    | rs121913502 | COSM41590            | Previously reported in haematopoietic samples in COSMIC database, human variation database frequency less than 0.14% |
| 100 | chr1  | 115258747 | 115258747 | C      | T    | exonic | NRAS   | G12D    | 5.62%  | nonsynonymous SNV    | rs121913237 | COSM564              | Previously reported in haematopoietic samples in COSMIC database, human variation database frequency less than 0.14% |
| 103 | chr5  | 170837547 | 170837547 | -      | TCTG | exonic | NPM1   | W288fs  | 43.04% | frameshift insertion |             | COSM1314             | Previously reported in haematopoietic samples in COSMIC database                                                     |
| 103 | chr13 | 28626716  | 28626716  | -      | T    | exonic | FLT3   | V194M   | 50.05% | nonsynonymous SNV    |             | COSM28039            | Previously reported in haematopoietic samples in COSMIC database                                                     |
| 103 | chr4  | 55599321  | 55599321  | A      | T    | exonic | KIT    | D9812V  | 36.64% | nonsynonymous SNV    | rs121913507 | COSM1314             | Previously reported in haematopoietic samples in COSMIC database, human variation database frequency less than 0.14% |
| 104 | chr11 | 32417943  | 32417943  | -      | GTCG | exonic | WT1    | R369fs  | 36.13% | frameshift insertion |             | COSM17559            | Previously reported in haematopoietic samples in COSMIC database                                                     |
| 105 | chr1  | 115258748 | 115258748 | C      | A    | exonic | NRAS   | G12C    | 37.39% | nonsynonymous SNV    |             | COSM1155             | Previously reported in haematopoietic samples in COSMIC database                                                     |
| 105 | chr4  | 55593431  | 55593431  | G      | A    | exonic | KIT    | V526I   | 57.50% | nonsynonymous SNV    |             | COSM27295            | Previously reported in haematopoietic samples in COSMIC database                                                     |
| 106 | chr5  | 170837547 | 170837547 | -      | CCTG | exonic | NPM1   | W288fs  | 33.59% | frameshift insertion |             | COSM17573            | Previously reported in haematopoietic samples in COSMIC database                                                     |
| 106 | chr4  | 106197377 | 106197377 | C      | G    | exonic | TET2   | H1904D  | 80.05% | nonsynonymous SNV    |             | COSM17573            | Previously reported in haematopoietic samples in COSMIC database                                                     |
| 107 | chr5  | 170837547 | 170837547 | -      | TCTG | exonic | NPM1   | W288fs  | 39.02% | frameshift insertion |             | COSM17559            | Previously reported in haematopoietic samples in COSMIC database                                                     |
| 107 | chr15 | 90631934  | 90631934  | C      | T    | exonic | IDH2   | R140Q   | 45.57% | nonsynonymous SNV    | rs121913502 | COSM41590            | Previously reported in haematopoietic samples in COSMIC database, human variation database frequency less than 0.14% |
| 110 | chr17 | 90631838  | 90631838  | C      | T    | exonic | IDH2   | R172K   | 15.11% | nonsynonymous SNV    | rs121913503 | COSM33733            | Previously reported in haematopoietic samples in COSMIC database, human variation database frequency less than 0.14% |
| 113 | chr4  | 106194004 | 106194010 | ATGAAA | -    | exonic | TET2   | N1489fs | 22.76% | frameshift deletion  |             | COSM52944,COSM442676 | Previously reported in haematopoietic samples in COSMIC database                                                     |
| 113 | chr2  | 25457242  | 25457242  | C      | T    | exonic | DNMT3A | R882H   | 45.82% | nonsynonymous SNV    | rs147001633 | COSM52944,COSM442676 | Previously reported in haematopoietic samples in COSMIC database, human variation database frequency less than 0.14% |

**Supplemental Table S3B: called nucleotide variants detected by NGS at relapse (excluding FLT3 ITD)**

| Patient ID | Chr   | Start     | End       | reference | alternative  | Exon/Intron | Gene   | Amino acid change  | VAF%   | Exonic Function      | dbSNP identifier | Cosmic identifier (v.68) | Notes for inclusion                                                                                                       |
|------------|-------|-----------|-----------|-----------|--------------|-------------|--------|--------------------|--------|----------------------|------------------|--------------------------|---------------------------------------------------------------------------------------------------------------------------|
| 1          | chr5  | 170837547 | 170837547 | -         | TCTG         | exonic      | NPM1   | W288fs             | 34.27% | frameshift insertion |                  | COSM17559                | Previously reported in haematopoietic samples in COSMIC database                                                          |
| 11         | chr12 | 12037403  | 12037403  | T         | A            | exonic      | ETV6   | V345D              | 27.47% | nonsynonymous SNV    |                  |                          | not detected in patient at diagnosis                                                                                      |
| 11         | chr12 | 11992216  | 11992216  | -         | GGGGGCC      | exonic      | ETV6   | F102fs             | 11.12% | frameshift insertion |                  |                          | frameshift indel, nonsense or splicing variant                                                                            |
| 11         | chr21 | 36252922  | 36252922  | -         | TGGGAAA      | exonic      | RUNX1  | A147fs             | 37.42% | frameshift insertion |                  |                          | Previously reported in non-haematopoietic sample in COSMIC database, insertion detected within 1 codon COSM1717871 T148fs |
| 11         | chr7  | 148508788 | 148508788 | C         | T            | exonic      | EZH2   | V626M              | 42.88% | nonsynonymous SNV    |                  | COSM1000723              | Previously reported in haematopoietic samples in COSMIC database                                                          |
| 11         | chr12 | 112926887 | 112926887 | G         | A            | exonic      | PTPN11 | G503R              | 46.44% | nonsynonymous SNV    |                  | COSM14259                | Previously reported in haematopoietic samples in COSMIC database                                                          |
| 20         | chr4  | 106158350 | 106158350 | A         | C            | exonic      | TET2   | Q1084P             | 52.88% | nonsynonymous SNV    | rs75056899       |                          | Somatic mutation documented in haematopoietic sample in COSMIC within same codon, not detected in patient at diagnosis    |
| 23         | chr4  | 106196819 | 106196819 | G         | T            | exonic      | TET2   | V1718L             | 45.75% | nonsynonymous SNV    | rs142312318      | COSM41742                | Previously reported in haematopoietic samples in COSMIC database, human variation database frequency less than 0.14%      |
| 25         | chr1  | 115256530 | 115256530 | G         | T            | exonic      | NRAS   | Q61K               | 13.10% | nonsynonymous SNV    | rs121913254      | COSM580                  | Previously reported in haematopoietic samples in COSMIC database, human variation database frequency less than 0.14%      |
| 29         | chrX  | 39914710  | 39914710  | G         | C            | exonic      | BCOR   | S1517C             | 51.71% | nonsynonymous SNV    |                  |                          | not detected in patient at diagnosis                                                                                      |
| 35         | chr2  | 25463566  | 25463566  | C         | A            | exonic      | DNMT3A | G706W              | 17.21% | nonsynonymous SNV    |                  |                          | not detected in patient at diagnosis                                                                                      |
| 35         | chr1  | 115256530 | 115256530 | G         | T            | exonic      | NRAS   | Q61K               | 23.68% | nonsynonymous SNV    | rs121913254      | COSM580                  | Previously reported in haematopoietic samples in COSMIC database, human variation database frequency less than 0.14%      |
| 35         | chr15 | 90631934  | 90631934  | C         | T            | exonic      | IDH2   | R140Q              | 18.28% | nonsynonymous SNV    | rs121913502      | COSM41590                | Previously reported in haematopoietic samples in COSMIC database, human variation database frequency less than 0.14%      |
| 56         | chr2  | 209113112 | 209113112 | C         | T            | exonic      | IDH1   | R132H              | 41.31% | nonsynonymous SNV    | rs121913500      | COSM28746                | Previously reported in haematopoietic samples in COSMIC database, human variation database frequency less than 0.14%      |
| 56         | chr2  | 25457242  | 25457242  | C         | T            | exonic      | DNMT3A | R882H              | 44.22% | nonsynonymous SNV    | rs147001633      | COSM52944,COSM442676     | Previously reported in haematopoietic samples in COSMIC database, human variation database frequency less than 0.14%      |
| 61         | chr5  | 170837547 | 170837547 | -         | TCTG         | exonic      | NPM1   | W288fs             | 20.87% | frameshift insertion |                  | COSM17559                | Previously reported in haematopoietic samples in COSMIC database                                                          |
| 61         | chr11 | 32413565  | 32413565  | C         | T            | exonic      | WT1    | R462Q              | 18.06% | nonsynonymous SNV    |                  | COSM21454                | Previously reported in haematopoietic samples in COSMIC database                                                          |
| 62         | chr21 | 36252940  | 36252940  | -         | GCCTGAGCGCGG | exonic      | RUNX1  | S141fs             | 32.44% | frameshift insertion |                  |                          | frameshift indel, nonsense or splicing variant                                                                            |
| 62         | chrX  | 133559247 | 133559247 | -         | CCACCTAA     | exonic      | PHF6   | H329 S330delinsPTX | 30.88% | stopgain             |                  |                          | frameshift indel, nonsense or splicing variant                                                                            |
| 62         | chr20 | 31023821  | 31023821  | G         | T            | exonic      | ASXL1  | E1102D             | 36.32% | nonsynonymous SNV    | rs139115934      | COSM36205                | Previously reported in haematopoietic samples in COSMIC database, human variation database frequency less than 0.14%      |
| 62         | chr17 | 7578394   | 7578394   | T         | G            | exonic      | TP53   | H140P              | 54.92% | nonsynonymous SNV    |                  | COSM44218                | Previously reported in haematopoietic samples in COSMIC database                                                          |
| 65         | chrX  | 133527545 | 133527545 | C         | A            | exonic      | PHF6   | C85X               | 33.13% | stopgain             |                  |                          | frameshift indel, nonsense or splicing variant                                                                            |
| 65         | chr4  | 106196819 | 106196819 | G         | T            | exonic      | TET2   | V1718L             | 13.28% | nonsynonymous SNV    | rs142312318      | COSM41742                | Previously reported in haematopoietic samples in COSMIC database, human variation database frequency less than 0.14%      |
| 65         | chr4  | 106158350 | 106158350 | A         | C            | exonic      | TET2   | Q1084P             | 26.96% | nonsynonymous SNV    | rs75056899       |                          | Somatic mutation documented in haematopoietic sample in COSMIC within same codon, not detected in patient at diagnosis    |
| 65         | chr21 | 36231791  | 36231791  | T         | C            | exonic      | RUNX1  | D198G              | 29.85% | nonsynonymous SNV    |                  | COSM24799                | Previously reported in haematopoietic samples in COSMIC database                                                          |
| 65         | chr17 | 74732960  | 74732960  | G         | C            | exonic      | SRSF2  | P95A               | 20.30% | nonsynonymous SNV    |                  | COSM307352               | Previously reported in haematopoietic samples in COSMIC database                                                          |
| 66         | chr1  | 115258748 | 115258748 | C         | T            | exonic      | NRAS   | G12S               | 21.84% | nonsynonymous SNV    | rs121913250      | COSM563                  | Previously reported in haematopoietic samples in COSMIC database, human variation database frequency less than 0.14%      |
| 68         | chr4  | 106157698 | 106157698 | T         | C            | exonic      | TET2   | Y867H              | 10.89% | nonsynonymous SNV    | rs144386291      | COSM327337               | Previously reported in haematopoietic samples in COSMIC database                                                          |
| 68         | chr4  | 106196834 | 106196834 | C         | T            | exonic      | TET2   | P1723S             | 11.06% | nonsynonymous SNV    | rs146348065      | COSM1235472              | Previously reported in haematopoietic samples in COSMIC database                                                          |
| 71         | chr12 | 12038956  | 12038956  | T         | C            | exonic      | ETV6   | F417L              | 72.97% | nonsynonymous SNV    |                  |                          | Different SNV in same codon in haematopoietic sample in COSMIC confirmed somatic COSM5879372 F417C                        |



|     |       |           |           |            |      |        |        |        |        |                      |             |                                                               |                                                                                                                       |
|-----|-------|-----------|-----------|------------|------|--------|--------|--------|--------|----------------------|-------------|---------------------------------------------------------------|-----------------------------------------------------------------------------------------------------------------------|
| 71  | chr17 | 7578548   | 7578548   | G          | T    | exonic | TP53   | P89T   | 32.18% | nonsynonymous SNV    |             |                                                               | Mutations in TP53 are widely distributed across the gene. FATHMM algorithm predicts a strong association with cancer. |
| 78  | chr11 | 32417914  | 32417917  | GTAC       | -    | exonic | WT1    | V379fs | 54.80% | frameshift deletion  |             |                                                               | frameshift indel, nonsense or splicing variant                                                                        |
| 81  | chr4  | 106196819 | 106196819 | G          | T    | exonic | TET2   | V1718L | 47.11% | nonsynonymous SNV    | rs142312318 | COSM41742                                                     | Previously reported in haematopoietic samples in COSMIC database, human variation database frequency less than 0.14%  |
| 84  | chr21 | 36164627  | 36164627  | -          | A    | exonic | RUNX1  | F416fs | 28.13% | frameshift insertion |             |                                                               | frameshift indel, nonsense or splicing variant                                                                        |
| 84  | chr17 | 74732959  | 74732959  | G          | T    | exonic | SRSF2  | P95H   | 17.14% | nonsynonymous SNV    |             | COSM211505,COSM211029,COSM211504                              | Previously reported in haematopoietic samples in COSMIC database                                                      |
| 88  | chr21 | 36259172  | 36259172  | G          | A    | exonic | RUNX1  | R107C  | 41.99% | nonsynonymous SNV    |             | COSM24736                                                     | Previously reported in haematopoietic samples in COSMIC database                                                      |
| 88  | chr17 | 74732959  | 74732959  | G          | T    | exonic | SRSF2  | P95H   | 66.09% | nonsynonymous SNV    |             | COSM211505,COSM211029,COSM211504                              | Previously reported in haematopoietic samples in COSMIC database                                                      |
| 89  | chr4  | 55561860  | 55561860  | A          | C    | exonic | KIT    | T84P   | 57.11% | nonsynonymous SNV    |             |                                                               | Different SNV in same codon in haematopoietic sample in COSMIC confirmed somatic COSM3380948 T84M                     |
| 89  | chr4  | 55599321  | 55599321  | A          | T    | exonic | KIT    | D812V  | 46.68% | nonsynonymous SNV    | rs121913507 | COSM1314                                                      | Previously reported in haematopoietic samples in COSMIC database, human variation database frequency less than 0.14%  |
| 89  | chr4  | 106196819 | 106196819 | G          | T    | exonic | TET2   | V1718L | 50.76% | nonsynonymous SNV    | rs142312318 | COSM41742                                                     | Previously reported in haematopoietic samples in COSMIC database, human variation database frequency less than 0.14%  |
| 91  | chrX  | 39932564  | 39932564  | C          | T    | exonic | BCOR   | V679I  | 28.54% | nonsynonymous SNV    | rs144722432 |                                                               | Previously reported in human variation database frequency less than 0.14%                                             |
| 91  | chr2  | 25463541  | 25463541  | G          | C    | exonic | DNMT3A | S714C  | 9.25%  | nonsynonymous SNV    |             | COSM442677,COSM87011                                          | Previously reported in haematopoietic samples in COSMIC database                                                      |
| 92  | chr17 | 7579419   | 7579428   | AGGGGGCTGG | -    | exonic | TP53   | P48fs  | 50.44% | frameshift deletion  |             |                                                               | frameshift indel, nonsense or splicing variant                                                                        |
| 92  | chr4  | 106157945 | 106157945 | A          | G    | exonic | TET2   | H949R  | 50.71% | nonsynonymous SNV    |             |                                                               | Previously reported in Papaemanuil NEJM 2016                                                                          |
| 92  | chr17 | 7578406   | 7578406   | C          | T    | exonic | TP53   | R136H  | 48.82% | nonsynonymous SNV    | rs28934578  | COSM10648,COSM99022,COSM1640851,COSM99024,COSM99023,COSM99914 | Previously reported in haematopoietic samples in COSMIC database, human variation database frequency less than 0.14%  |
| 92  | chr5  | 149436930 | 149436930 | C          | T    | exonic | CSF1R  | G747R  | 52.90% | nonsynonymous SNV    | rs41355444  |                                                               | Previously reported in human variation database frequency less than 0.14%                                             |
| 92  | chr17 | 74732959  | 74732959  | G          | A    | exonic | SRSF2  | P95L   | 43.59% | nonsynonymous SNV    |             | COSM146288,COSM211506,COSM211028                              | Previously reported in haematopoietic samples in COSMIC database                                                      |
| 95  | chr2  | 25457242  | 25457242  | C          | T    | exonic | DNMT3A | R882H  | 11.24% | nonsynonymous SNV    | rs147001633 | COSM52944,COSM442676                                          | Previously reported in haematopoietic samples in COSMIC database, human variation database frequency less than 0.14%  |
| 95  | chr5  | 170837547 | 170837547 | -          | TCTG | exonic | NPM1   | W288fs | 10.87% | frameshift insertion |             | COSM17559                                                     | Previously reported in haematopoietic samples in COSMIC database                                                      |
| 96  | chr12 | 25398284  | 25398284  | C          | A    | exonic | KRAS   | G12V   | 46.39% | nonsynonymous SNV    | rs121913529 | COSM1140133,COSM520                                           | Previously reported in haematopoietic samples in COSMIC database, human variation database frequency less than 0.14%  |
| 111 | chr11 | 32417911  | 32417911  | -          | C    | exonic | WT1    | S381fs | 6.85%  | frameshift insertion |             | COSM41864,COSM1166635                                         | Previously reported in haematopoietic samples in COSMIC database                                                      |
| 112 | chr15 | 90631934  | 90631934  | C          | T    | exonic | IDH2   | R140Q  | 20.83% | nonsynonymous SNV    | rs121913502 | COSM41590                                                     | Previously reported in haematopoietic samples in COSMIC database, human variation database frequency less than 0.14%  |

**Supplemental Table S4.** Patients with changes in genetic mutation profile only between diagnosis and relapse.

| Patient ID | Genetic aberrations at diagnosis                                                                                               | genetic aberrations pre-allo                                                                                               | genetic aberrations at relapse                                                                                                                                                                       |
|------------|--------------------------------------------------------------------------------------------------------------------------------|----------------------------------------------------------------------------------------------------------------------------|------------------------------------------------------------------------------------------------------------------------------------------------------------------------------------------------------|
| 20         | FLT3 ITD 2.04                                                                                                                  | N/A                                                                                                                        | FLT3 ITD 0.00                                                                                                                                                                                        |
|            | NRAS G13D 28.51                                                                                                                |                                                                                                                            | NRAS G13D 0.00                                                                                                                                                                                       |
|            | TET2 Q1084P 0.00                                                                                                               |                                                                                                                            | TET2 Q1084P 52.88                                                                                                                                                                                    |
|            | 46,XY,inv(16)(p13q22)[8]/<br>47,idem,+22[2]<br><br>CBFB gene rearrangement by FISH [47/91]<br>CBFB/MYH11 to ABL1 ratio of 1.82 |                                                                                                                            | cdNA molecular analysis: CBFB/MYH11 positive;<br>CBFB/MYH11 to ABL1 ratio of 0.0136.                                                                                                                 |
| 56         | DNMT3A R882H 41.89                                                                                                             | N/A                                                                                                                        | DNMT3A R882H 44.22                                                                                                                                                                                   |
|            | FLT3 ITD 28.05                                                                                                                 |                                                                                                                            | FLT3 ITD 52.83                                                                                                                                                                                       |
|            | NPM1 insTCTG 33.33                                                                                                             |                                                                                                                            | NPM1 insTCTG 60.00                                                                                                                                                                                   |
|            | IDH1 R132H 1.15                                                                                                                |                                                                                                                            | IDH1 R132H 41.31                                                                                                                                                                                     |
|            | 46,XY[20]                                                                                                                      |                                                                                                                            | 46, XY[20]                                                                                                                                                                                           |
| 112        | IDH2 R140Q 0.38                                                                                                                | N/A                                                                                                                        | IDH2 R140Q 20.83                                                                                                                                                                                     |
|            | t(10;11) in 20/20 cells<br>KMT2A rearranged 94/100 by interphase FISH                                                          |                                                                                                                            | t(10;11) in 16/20 cells [KMT2A 55/100 by FISH]<br>KMT2A rearranged 55/100 by interphase FISH                                                                                                         |
| 60         | DNMT3A K826R 43.6                                                                                                              | DNMT3A K826R 2.92                                                                                                          | DNMT3A K826R 0.45                                                                                                                                                                                    |
|            | 46,XX[20]                                                                                                                      | N/A                                                                                                                        | 46,XX[20]                                                                                                                                                                                            |
| 65*        | PHF6 C85X 0.09                                                                                                                 | PHF6 C85X 25.46                                                                                                            | PHF6 C85X 33.13                                                                                                                                                                                      |
|            | RUNX1 D198G 55.84                                                                                                              | RUNX1 D198G 34.43                                                                                                          | RUNX1 D198G 29.85                                                                                                                                                                                    |
|            | RUNX1 L175P 7.48                                                                                                               | RUNX1 L175P 0.94                                                                                                           | RUNX1 L175P 0.51                                                                                                                                                                                     |
|            | SRSF2 P95A 47.58                                                                                                               | SRSF2 P95A 38.54                                                                                                           | SRSF2 P95A 20.3                                                                                                                                                                                      |
|            | TET2 V1718L 51.79                                                                                                              | TET2 V1718L 50.54                                                                                                          | TET2 V1718L 13.28                                                                                                                                                                                    |
|            | TET2 Q1084P 0.02                                                                                                               | TET2 Q1084P 0.03                                                                                                           | TET2 Q1084P 26.96                                                                                                                                                                                    |
|            | 47,XY,+13[10]                                                                                                                  | 46,XY[60]                                                                                                                  | 47, XY, +13[5]/46,XY[5]                                                                                                                                                                              |
| 68         | NPM1 insTCTG 35.71%                                                                                                            | NPM1 insTCTG 0.00                                                                                                          | NPM1 insTCTG 35.84                                                                                                                                                                                   |
|            | TET2 Y867H 0.27                                                                                                                | TET2 Y867H 0.15                                                                                                            | TET2 Y867H 10.89                                                                                                                                                                                     |
|            | TET2 P1723S 0.00                                                                                                               | TET2 P1723S 0.11                                                                                                           | TET2 P1723S 11.06                                                                                                                                                                                    |
|            | FLT3 ITD 84bp 32.4%                                                                                                            | FLT3 ITD 0.0                                                                                                               | FLT3 ITD 84bp 27.8%                                                                                                                                                                                  |
|            | 46,XX[20]                                                                                                                      | N/A                                                                                                                        | 46,XX[19]/46,XY[1]<br>XX[94]/XY[17] by interphase FISH (85% host)                                                                                                                                    |
| 78         | WT1 V379fs 0.00                                                                                                                | WT1 V379fs 0.00                                                                                                            | WT1 V379fs 54.8                                                                                                                                                                                      |
|            | 46,XX,t(9;11)(p22;q23)[10]<br><br>KMT2A gene rearrangement positive by metaphase FISH [5]                                      | KMT2A gene rearrangement negative by metaphase FISH [65]<br><br>KMT2A gene rearrangement negative by interphase FISH [100] | 46,XX,t(9;11)(p22;q23)[10]<br>XX[93]/XY[7] by interphase FISH (93% host)<br>KMT2A gene rearrangement positive by metaphase FISH [5]<br>KMT2A gene rearrangement positive by interphase FISH [98/100] |

N/A= sample not available

\*pre-allo-SCT sample was taken prior to patient achieving CR.

**Supplemental Table S5.** Patients with changes in genetic mutation and karyotypic profile between diagnosis and relapse.

| Patient ID | genetic aberrations at diagnosis                                            | genetic aberrations at pre-allo                                                   | genetic aberrations at relapse                                                                                                                                                                                                                                                              |
|------------|-----------------------------------------------------------------------------|-----------------------------------------------------------------------------------|---------------------------------------------------------------------------------------------------------------------------------------------------------------------------------------------------------------------------------------------------------------------------------------------|
| 11         | EZH2 V626M 36.22                                                            | N/A                                                                               | EZH2 V626M 42.88                                                                                                                                                                                                                                                                            |
|            | PTPN11 G503R 44.67                                                          |                                                                                   | PTPN11 G503R 46.44                                                                                                                                                                                                                                                                          |
|            | ETV6 F102fs 0.00                                                            |                                                                                   | ETV6 F102fs 11.12                                                                                                                                                                                                                                                                           |
|            | ETV6 V345D 0.00                                                             |                                                                                   | ETV6 V345D 27.47                                                                                                                                                                                                                                                                            |
|            | RUNX1 A147fs 35.43                                                          |                                                                                   | RUNX1 A147fs 37.42                                                                                                                                                                                                                                                                          |
|            | 46,XY[20]                                                                   | N/A                                                                               | 46,XY[53]/47,X,idic(Y)(q11.2q11.2),+idic(Y)[12]/48,X,idic(Y),+idic(Y)x2[11]/49,X,idic(Y),+idic(Y)x3[2]/46,XX[6]                                                                                                                                                                             |
| 17         | 6bp FLT3 ITD 1.12                                                           | FLT3 ITD 0.00                                                                     | FLT3 ITD 0.00                                                                                                                                                                                                                                                                               |
|            | NRAS Q61R 5.00                                                              | NRAS Q61R 0.01 (ddPCR-ND)                                                         | NRAS Q61R 0.00 ddPCR ND                                                                                                                                                                                                                                                                     |
|            | 46,XX,t(12;17)(p11;q11)[3]/46,XX[18]                                        | 46,XX[60]                                                                         | 46,XX,-2, add(7)(q32),+8,add(8)(q24),add(16)(q1)[3]/46,idem,add(X)(q2),add(3)(p21),add(3)(p25),add(10)(p1),add(18)(q2),add(21)(q22)[3]/46,idem,add(4)(q3),add(5)(q3),add(9)(q2),del(13)(q1q2)[3]/46,XX,-2,der(7)add(7)(p2)add(7)(q32),add(10)(p1),add(16)(q1),add(19)(q1),+mar[5]//46,XY[2] |
| 25         | NRAS Q61K 0.00 ddPCR                                                        | NRAS Q61K 0.00 (ddPCR-ND)                                                         | NRAS Q61K 13.10 ddPCR                                                                                                                                                                                                                                                                       |
|            | 46,XX,t(6;11)(q27;q23)[9]/46,XX[1]<br>KMT2A rearrangement confirmed by FISH | No evidence of a KMT2A gene translocation by FISH [100]                           | 47,X,add(X)(p1),t(1;2)(q25;q31),der(3)add(3)(p2)add(3)(q2),t(6;8)(p21;q24),t(6;11)(q27;q23),add(9)(p1),add(11)(p15),add(15)(q1),add(17)(q2),+mar[10]<br>KMT2A rearrangement confirmed by FISH                                                                                               |
| 35         | DNMT3A G706W 0.00                                                           | DNMT3A G706W 0.00                                                                 | DNMT3A G706W 17.82                                                                                                                                                                                                                                                                          |
|            | IDH2 R140Q 43.84                                                            | IDH2 R140Q 44.61                                                                  | IDH2 R140Q 21.23                                                                                                                                                                                                                                                                            |
|            | NRAS Q61K 0.00                                                              | NRAS Q61K 0.81                                                                    | NRAS Q61K 21.24                                                                                                                                                                                                                                                                             |
|            | SRSF2 P95R 40.86                                                            | SRSF2 P95R 46.23                                                                  | SRSF2 P95R 21.25                                                                                                                                                                                                                                                                            |
|            | 46,XY,t(12;22)(p13;q12)[10]<br>ETV6 gene rearrangement positive [5/5]       | 46,XY,t(12;22)(p13;q12)[2]/47,XY,+8,t(12;22)[3]/48,XY,+8,+8,t(12;22)[2]/46,XY[23] | 46,X,-Y,+8,t(12;22)(p13;q12)[10]/46,idem,add(20)(q13)[2]                                                                                                                                                                                                                                    |
| 84*        | RUNX1 S141L 15.28                                                           | RUNX1 S141L 0.49                                                                  | RUNX1 S141L 0.00                                                                                                                                                                                                                                                                            |
|            | RUNX1 F416fs 10.57                                                          | RUNX1 F416fs 85.13                                                                | RUNX1 F416fs 28.13                                                                                                                                                                                                                                                                          |
|            | SRSF2 55.32                                                                 | SRSF2 36.92                                                                       | SRSF2 17.14                                                                                                                                                                                                                                                                                 |
|            | 46,XY[20]                                                                   | 46,XY[26]                                                                         | 46,XY,inv(3)(q21q26)[9]/46,XY[12]                                                                                                                                                                                                                                                           |
| 92         | CSF1R G747R 46.85                                                           | CSF1R G747R 51.12                                                                 | CSF1R G747R 52.9                                                                                                                                                                                                                                                                            |
|            | IDH1 R132C 41.34                                                            | IDH1 R132C 0.30                                                                   | IDH1 R132C 0.00                                                                                                                                                                                                                                                                             |
|            | SRSF2 P95L 71.82                                                            | SRSF2 P95L 36.1                                                                   | SRSF2 P95L 43.59                                                                                                                                                                                                                                                                            |
|            | TET2 H949R 45.93                                                            | TET2 H949R 46.54                                                                  | TET2 H949R 50.71                                                                                                                                                                                                                                                                            |
|            | TP53 R136H 0.08                                                             | TP53 R136H 3.74                                                                   | TP53 R136H 48.82                                                                                                                                                                                                                                                                            |
|            | TP53 P48fs 0.00                                                             | TP53 P48fs 0.00                                                                   | TP53 P48fs 50.44                                                                                                                                                                                                                                                                            |
|            | 46,XY[20]                                                                   | N/A                                                                               | 47,XY,+8[4]/46,XY,add(3)(p2)[3]/46,XY,t(2;15)(q37;q2)[2]/46,XY,dup(18)(q11.2q21)[1]/46,XY[3]//46XX[1]                                                                                                                                                                                       |

\*patient not in CR pre-allo-SCT

N/A= sample not available

**Supplemental Table S6.** Patients with changes in karyotypic profile only between diagnosis and relapse.

| Patient ID | genetic aberrations at diagnosis                                                                                                                                                                                                                | genetic aberrations at CR pre-allo                                         | genetic aberrations at relapse                                                                                                                                                                                                                  |
|------------|-------------------------------------------------------------------------------------------------------------------------------------------------------------------------------------------------------------------------------------------------|----------------------------------------------------------------------------|-------------------------------------------------------------------------------------------------------------------------------------------------------------------------------------------------------------------------------------------------|
| 10         | 46,XY,t(5;11)(q35;p15) [20]<br>NSD1 (5q35) gene rearrangement by FISH [93/100]                                                                                                                                                                  | No evidence of an NSD1 (5q35) gene rearrangement by FISH [34]              | 45,X,-Y,<br>add(1)(P3),add(1)(q2),add(2)(q3),der(3)t(3;11)(p1;p1),add(4)(q2),der(5)t(5;11)(q35.3;p15.4),add(6)(p2),der(11)t(3;11)(p1;p1)add(11)(q2),der(11)t(5;11)add(11)(q1),-13,-16,add(17)(p1),add(18)(q2),add(19)(q13),+2mar[8]/46,XY[2]    |
| 54         | 45,X,X,t(8;21)(q22;q22),del(9)(q1q22)[10]                                                                                                                                                                                                       | 46,XX[60]                                                                  | 45,X,-X,add(1)(q32),add(7)(q22),-8,t(8;21)(q22;q22),add(8)(q1),del(9)(q1q22),add(10)(q22),add(11)(p15),add(12)(q24),add(13)(q3),-16,-17,add(17)(q2),add(18)(q22),+3mar[cp7]/46,XX[3]                                                            |
| 66         | 46,XY,del(7)(q22q36),<br>der(10)t(10;11)(p12-13;q13-21),der(11)<br>add(11)(p1)t(10;11),del(12)(q2?2q2?4),<br>del(13)(q1?4q2?2)[12]/46,XY[3]                                                                                                     | N/A                                                                        | 45~46,XY,del(6)(q1q2),del(7)(q2q3),der(10)t(10;11)(p12~13;q13~21),der(11)add(11)(p1)t(10;12),del(13)(q1q2),<br>add(17)(p1),+1~3mar[cp7]/46,XY[5]                                                                                                |
| 71         | 46,XX[20]                                                                                                                                                                                                                                       | N/A                                                                        | 45~46,XX,+1,add(1)(p1),der(1;10)(q10;p10),add(2)(p2),t(3;7)(p1;q3),add(4)(q3),-5,<br>add(5)(q2),+6,der(6)t(6;18)(q1;q1),add(13)(q2),-18,-20,add(20)(p1),add(21)(q2),+3mar[cp14]/46,XX[1]/<br>/46, XY[3]                                         |
| 88         | 46,XY[20]                                                                                                                                                                                                                                       | N/A                                                                        | 51,XY,der(4)t(1;4)(q21;q3),+9,+12,+13,+15,+21[7]/46,XY,t(7;16)(q2;q2)[2],46XY[1]                                                                                                                                                                |
| 89         | 46,XY,t(3;6)(p25;q25)?c,del(5)(q1q3)[4]/<br>47,XY,t(3;6)(p25;q25)?c,del(5)(q1q3),+9[6]                                                                                                                                                          | N/A                                                                        | 46,XY,add(1)(p36),t(3;6)(p25;q25)?c,del(5)(q1q3)[5]/83,XXYY,-1,-2,der(3)t(3;6)?c,der(3)t(3;6)?ct(3;22)(q2;q13),<br>-4,del(5)(q1q3)x2,der(6)t(3;6)?cx2,-7,add(9)(q2),add(11)(p1),-13,-15,-16,der(16)t(7;16)(q1;p1),-17,<br>-18,der(22)t(3;22)[6] |
| 90         | 46,XX[30]                                                                                                                                                                                                                                       | 46,XX[20]                                                                  | 46,XX,add(5)(q13)[9]/46,XX[1]/46,XY[3]                                                                                                                                                                                                          |
| 91         | 45,XY,-7[10]                                                                                                                                                                                                                                    | 45,XY,-7[2]/46,XY[2]<br>Monosomy 7 detected by interphase<br>FISH [71/101] | 45,XY,-7,inv(12)(q13q2)x2,del(15)(q?1q2)[5]/46,idem,+del(15)(q?1q2)[3]/46,XY[2]                                                                                                                                                                 |
| 96         | 46,XX,der(6)t(6;11)(q21;q23),der(11)t(11;16)(<br>q2;q2),der(16)t(11;16)(q2;q2)t(6;11)(q2;q23)[<br>10]<br>KMT2A gene rearrangement confirmed by<br>metaphase FISH [4/5]                                                                          | 46,XX[30]                                                                  | 50, XX,<br>der(6)t(6;11)(q21;q23),+8,+8,der(11)t(11;16)(q2;q2),+16,der(16)t(11;16)q2;q2t(6;11)(q2;q23)x2,+19[2]/50,idem,<br>t(X;15)(p22;q1)[8]<br>KMT2A gene rearrangement confirmed by interphase FISH [94/100]                                |
| 102        | 46, XX, del 11q, add 21q [20]. Undefined<br>abnormal 5p, 6q detected. MLL 11q23<br>rearrangement detected by FISH [99/100].<br>46,XX,add(5)(p?),add(6)(q?),del(11)(q?),<br>add(21)(q?) [20]<br>KMT2A rearrangement detected by FISH<br>[99/100] | N/A                                                                        | 48,XX,t(1;14),+6 +8,add (9)(p?) [10/10]                                                                                                                                                                                                         |

N/A= sample not available

**Supplemental Table S7.** Patients with no changes in profile of genetic aberrations between diagnosis and relapse.

| Patient ID | genetic aberrations at diagnosis                                        | genetic aberrations pre-allo                                                                      | genetic aberrations at relapse                                                                           |
|------------|-------------------------------------------------------------------------|---------------------------------------------------------------------------------------------------|----------------------------------------------------------------------------------------------------------|
| 1          | FLT3 ITD 15.22                                                          | FLT3 ITD 0.00                                                                                     | FLT3 ITD 20.42                                                                                           |
|            | NPM1 insTCTG 38.95                                                      | NPM1 insTCTG 0.06                                                                                 | NPM1 insTCTG 34.27                                                                                       |
|            | 46,XX[20]                                                               | N/A                                                                                               | XX[90]/XY[10]                                                                                            |
| 61*        | FLT3 ITD 33.50                                                          | FLT3 ITD 0.00                                                                                     | FLT3 ITD 42.26                                                                                           |
|            | NPM1 insTCTG 39.34                                                      | NPM1 insTCTG 7.64                                                                                 | NPM1 insTCTG 10.58                                                                                       |
|            | WT1 R462Q 42.26                                                         | WT1 R462Q 20.87                                                                                   | WT1 R462Q 18.06                                                                                          |
|            | 46,XX[20]                                                               | 46,XX,t(3;5)(p2;q1)[7]/<br>46,XX,t(5;16)(q2;q1)[3]/<br>46,XX[15]                                  | 46,XX[20]                                                                                                |
| 62*        | ASXL1 E1102D 50.69                                                      | ASXL1 E1102D 49.39                                                                                | ASXL1 E1102D 36.32                                                                                       |
|            | PHF6 S330fs 26.56                                                       | PHF6 S330fs 30.22                                                                                 | PHF6 S330fs 30.88                                                                                        |
|            | RUNX1 S141fs 40.86                                                      | RUNX1 S141fs 32.12                                                                                | RUNX1 S141fs 32.44                                                                                       |
|            | TP53 H179P 85.78                                                        | TP53 H179P 62.69                                                                                  | TP53 H179P 54.92                                                                                         |
|            | 47~49,XX,+X,del(6)(q2),+10,+12,del(12)(p1),<br>del(17)(p1),+21,inc[cp8] | 48~49,XX,+X,del(6)(q13q21),+12,add(12)(p1),<br>del(12)(p11p13),del(17)(p1),+21[cp11]/<br>46,XX[4] | 48~49,X,+X,add(X)(q2),del(6)(q1q2),+12,add(12)(p1),del(12)(p1),<br>del(17)(p1),+21,+2~3mar[cp6]/46,XY[4] |
| 64         | SF3B1 K700E 11.45                                                       | SF3B1 K700E 1.13                                                                                  | SF3B1 K700E 3.01                                                                                         |
|            | 46,XY,inv(3)(q21q26)[10]/<br>46,XY[5]                                   | 46,XY,inv(3)(q21q26)[8]/<br>46,XY[2]                                                              | 46,XY,inv(3)(q21q26)[9]/46,XY[1]                                                                         |

\*patient not in CR pre-allo-SCT

N/A= sample not available

patient #102 had no mutations detected by NGS at diagnosis or at relapse and is not shown in this table
